# 1 Deciphering transcriptional networks during human cardiac 2 development

## 3 Authors

4 Robin Canac,<sup>1,3</sup> Bastien Cimarosti,<sup>1,3</sup> Aurore Girardeau,<sup>1</sup> Virginie Forest,<sup>1</sup> Pierre Olchesqui,<sup>1</sup>  
5 Jeremie Poschmann,<sup>2</sup> Richard Redon,<sup>1</sup> Patricia Lemarchand,<sup>1</sup> Nathalie Gaborit,<sup>1,4,\*</sup> Guillaume  
6 Lamirault,<sup>1,4,\*</sup>

7 <sup>1</sup> Nantes Université, CHU Nantes, CNRS, INSERM, l'institut du thorax, F-44000 Nantes, France

8 <sup>2</sup> INSERM, Nantes Université, Center for Research in Transplantation and Translational Immunology, UMR 1064, ITUN, F-  
9 44000 Nantes, France

10 <sup>3</sup> These authors contributed equally

11 <sup>4</sup> These authors contributed equally

12 \* Correspondance: [nathalie.gaborit@univ-nantes.fr](mailto:nathalie.gaborit@univ-nantes.fr) (N.G.), [guillaume.lamirault@univ-nantes.fr](mailto:guillaume.lamirault@univ-nantes.fr) (G.L.)

## 13 **Abstract**

14 Human heart development is governed by transcription factor (TF) networks  
15 controlling dynamic and temporal gene expression alterations. Therefore, to comprehensively  
16 characterize these transcriptional regulations, day-to-day transcriptomic profiles were  
17 generated throughout the directed cardiac differentiation, starting from three distinct human  
18 induced pluripotent stem cell lines from healthy donors (32 days). We applied an expression-  
19 based correlation score to the chronological expression profiles of the TF genes, and clustered  
20 them into 12 sequential gene expression waves. We then identified a regulatory network of  
21 more than 23 000 activation and inhibition links between 216 TFs. Within this network, we  
22 observed previously unknown inferred transcriptional activations linking IRX3 and IRX5 TFs to  
23 three master cardiac TFs: GATA4, NKX2-5 and TBX5. Luciferase and co-immunoprecipitation  
24 assays demonstrated that these 5 TFs could (1) activate each other's expression, (2) interact  
25 physically as multiprotein complexes and (3) together, finely regulate the expression of  
26 *SCN5A*, encoding the major cardiac sodium channel. Altogether, these results unveiled  
27 thousands of interactions between TFs, generating multiple robust hypotheses governing  
28 human cardiac development.

29

## 30 **Keywords**

31 Stem cell differentiation, Human induced pluripotent stem cells, Heart development,  
32 Transcription factor, Gene regulatory networks, Transcriptomics, Transcription factor  
33 complexes, Iroquois transcription factors

## 34 **Abbreviations**

36 CHD : Congenital Heart Diseases  
37 DEG : Differentially Expressed Genes  
38 GO : Gene Ontology  
39 hiPSCs : human induced Pluripotent Stem Cells  
40 IGNiTe : Gene expression-based sub-network involving IRX3, IRX5, GATA4, NKX2-5 and TBX5  
41 IRX : Iroquois homeobox transcription factor family  
42 LEAP : Lag-based Expression Association for Pseudotime-series  
43 MAC : Maximum Absolute Correlation  
44 mESC : Mouse Embryonic Stem Cell  
45 PC : Principal component  
46 PCA : Principal Component Analysis  
47 PPI : Protein-Protein Interaction  
48 TF : Transcription Factor  
49

## 50 **Introduction**

51 Heart formation is a complex process that requires spatio-temporal interplay between  
52 distinct and interdependent cell types through specific signaling and transcriptional pathways,  
53 leading to their differentiation and specification (1,2). Defects in this developmental process  
54 result in congenital heart disease as well as in a number of inherited cardiac disorders in adults  
55 (3). The specific gene expression program, governing the formation of a functional heart,  
56 needs precise regulation, in a time-, cell- and space-dependent manner (4). This program is  
57 mediated by transcription factors (TFs) regulating the expression of other TF-encoding genes  
58 and establish specific TF networks, such as between GATA4, NKX2-5 and TBX5 (5,6). These  
59 networks control and permanently remodel over time the transcriptional expression program  
60 that govern heart development.

61 A thorough understanding of these networks is crucial to gain knowledge on the  
62 transcriptional regulations and dysregulations that govern normal and pathological cardiac  
63 development, respectively. However, full knowledge of the global TF regulatory network of  
64 cardiac development is still missing. For instance, while several studies on Iroquois homeobox  
65 TF family (IRX) have shown their key roles on the regulation of adult cardiac electrical  
66 conduction (7–11), their function during human cardiac development has not been  
67 investigated yet. Cellular models derived from human induced Pluripotent Stem Cells (hiPSCs)

68 offer a unique opportunity to address these challenges, as they reproduce the cellular  
69 differentiation processes which lead stem cells to acquire a cardiac cell phenotype, carrying  
70 the genome of either healthy subjects or patients with inherited cardiac diseases.

71 In the present study, we first validated hiPSC cardiac differentiation model as a  
72 relevant tool to unravel the global TF regulatory network governing human cardiac  
73 development, identifying a network of 216 TFs with time-dependent activations and  
74 inactivations. Among these, we identified and biologically validated an undescribed TF  
75 regulatory network involving IRX3, IRX5 and three main cardiac TFs, GATA4, NKX2-5 and TBX5.  
76 Furthermore, we generated new hypotheses on the potential mechanisms leading to the  
77 cooperative effect of these TFs that could form a functional multiprotein complex activating  
78 the promoter of *SCN5A*, encoding the main cardiac sodium channel.

## 79 **Results**

### 80 ***Directed cardiac differentiation robustly generates functional cardiac cells***

81 Cardiac differentiation of three hiPSC lines reprogrammed from three healthy donors  
82 was used as a cellular model of cardiac development (Fig 1A). After directed cardiac  
83 differentiation, all three hiPSC lines expressed cardiac-specific troponin I (Fig 1B), and  
84 displayed spontaneous contractions (Fig 1C), demonstrating their capability to form functional  
85 cardiomyocytes.

86

### 87 **Fig 1. Transcriptomic and functional characterization of cardiac cells derived from hiPSCs.**

88 (A) Diagram illustrating the experimental design involving three distinct cardiac differentiations of  
89 three hiPSC lines reprogrammed from healthy donors. (B) Immunocytochemistry staining of troponin  
90 I (red) and DAPI (blue) at D30 of cardiac differentiation for all 3 hiPSC lines. (C) Representative  
91 contraction patterns captured by MUSCLEMOTION software on movies at D30 of cardiac  
92 differentiation for the 3 hiPSC lines. (D) UMAP displaying single-cell RNA-seq data at D30 of cardiac  
93 differentiation of hiPSC-A line. The color code indicates the different cell types identified. Cell  
94 population fractions are listed on the right. See also Fig S1.

95

96           Based on single-cell transcriptomic data from 14 520 cells obtained at the end of  
97 directed cardiac differentiation (Fig 1D and Supplementary Fig S1), about 95% of the cells  
98 could be successfully annotated to one of the 15 cell types described in the developing human  
99 fetal heart (4), including 34% cardiomyocytes, 21% epicardial cells, and 15% fibroblast-like  
100 cells. This distribution was similar to previous findings in the adult human heart (12). These  
101 data indicate that directed cardiac hiPSC differentiation generated the cellular diversity  
102 observed in human fetal heart, known to be not only necessary for cardiac function, but also  
103 required for the establishment of cardiomyocytes (13).

104           To investigate how gene expression variations are orchestrated throughout cardiac  
105 differentiation, we then generated daily transcriptomic data, from hiPSC stage (D-1) to day 30  
106 (D30), for three independent cardiac differentiations of each of the three hiPSC lines (Fig 2A).  
107 Directed cardiac differentiation was associated to gradual temporal transcriptomic changes,  
108 represented on the first principal component (PC1) of the principal component analysis (Fig  
109 2B). PC1 was significantly correlated with time from the onset of cardiac differentiation  
110 (spearman correlation coefficient  $\rho=0.87$ ,  $p\text{-value} < 2.2 \cdot 10^{-16}$ ). Cardiac differentiation  
111 evolution, represented by PC1 (Fig 2C), showed that 85% of transcriptomic variations were  
112 achieved by D14 (Fig 2D). Altogether, these data demonstrate that the first 14 days of hiPSC  
113 cardiac differentiation represent the ideal time window to investigate the molecular processes  
114 that lead to functional cardiac cells.

115

## 116 **Fig 2. Transcriptomic time-course analysis of hiPSC cardiac differentiation.**

117 (A) Methodological workflow. Steps are represented in white rectangle and outputs in red rectangles.  
118 (B) Global transcriptomic variations displayed with the first two components of the Principal  
119 Component Analysis. Three cardiac differentiations were studied for each of the three hiPSC lines. For  
120 each cardiac differentiation, a line connects the time-points in chronological order. (C) Boxplots  
121 displaying the distribution of PC1 coordinates of each replicates at each day (median +/- quartile). (D)  
122 Histogram comparing distribution of PC1 coordinates at the beginning (D-1), the middle (D14) and the  
123 end (D30) of hiPSC cardiac differentiations (Mean +/- SEM; Wilcoxon matched-pairs signed rank test).

124

125 ***Transcriptomic kinetics of hiPSC cardiac differentiation unveiled biological processes***  
126 ***involved during cardiac development***

127 Focusing on gene expression changes related to hiPSC cardiac differentiation, the 3  
128 000 genes with the most significant expression variation during directed cardiac  
129 differentiation (differentially expressed genes; DEG) were identified and grouped into 12  
130 clusters, chronologically ordered based on the time point when their expression level changes  
131 the most, showing distinct temporal gene expression profiles (Fig 3A). The average temporal  
132 expression pattern of each cluster was then compared to transcriptomic data obtained for the  
133 same genes from an *in vivo* reference model of murine cardiac development ((14); Fig 3B). As  
134 cardiac cells derived from hiPSCs are usually described as reaching an equivalent of, at the  
135 most, E18.5 stage in murine embryonic development (15), we restricted the comparison of  
136 the hiPSC dataset to murine developmental transcriptomic data obtained between murine  
137 embryonic stem cells and E18.5 stage. Apart from cluster D, all clusters displayed strikingly  
138 similar expression patterns between hiPSC cardiac differentiation and murine cardiac  
139 development. Nevertheless, genes of cluster D were associated with gastrulation biological  
140 processes (Fig 3B – Cluster D middle panel) which is completed before E7.5. As no data was  
141 available between the mouse embryonic stem cell (mESC) and E7.5 stages in the murine  
142 experiments, relevant gene expression changes associated to this process were likely to be  
143 absent in the murine transcriptomic dataset but remained detectable in the daily hiPSCs  
144 cardiac differentiation dataset. For all other 11 clusters, hiPSC cardiac differentiation could be  
145 confidently matched to sequential gene expression waves that occur during murine cardiac  
146 development. Altogether, these clusters recapitulate key steps of cardiac development,  
147 including (1) expression decrease of genes related to pluripotency and stemness maintenance  
148 (Fig 3B – Cluster A to C), followed by the transient expression of genes related (2) to  
149 gastrulation and mesoderm formation (Fig 3B – Cluster D) and (3) to early cardiac  
150 development (Fig 3B – Cluster E). These specific patterns were then followed by the successive  
151 implementation and persistence over time of gene expression waves that set up the  
152 sequential establishment of the functional cardiac phenotype (Fig 3B – Cluster F to L). To  
153 confirm these results, similar analyses were conducted on the top 3 000 DEG during murine  
154 cardiac development from mESCs to E18.5 (Supplementary Fig S2). This again revealed  
155 consistency of gene expression changes during hiPSC cardiac differentiation and during  
156 murine cardiac development. Collectively, these analyses demonstrate that hiPSC cardiac  
157 differentiation precisely recapitulates transcriptomic processes related to human and mouse  
158 cardiac development.

159

160 **Fig 3. Expression profile and functional annotation of the top 3 000 differentially expressed genes**  
161 **(DEGs) during hiPSC cardiac differentiation, and comparison with murine cardiac development gene**  
162 **expression dataset.**

163 (A) Heatmap displaying DEG expression levels. The entire data set was used to aggregate the genes  
164 into 12 clusters and the mean expression level of 9 replicates is represented. (B) For each cluster,  
165 average gene expression level during hiPSC cardiac differentiation (left panel for each cluster) and of  
166 their orthologs during murine cardiac development (mESCs to E18.5 stage, right panel for each cluster)  
167 are shown. Replicate gene expression levels were averaged for each hiPSC line (n=3 per hiPSC line and  
168 per timepoint) and for murine data (n=3 to n=6 per timepoint, depending on the stage). The 15 most  
169 significantly related GO terms are displayed for each cluster on the middle panel. See also Fig S2.

170

### 171 ***Prediction of gene regulatory networks governing hiPSC cardiac differentiation***

172 TFs are known to be key players of developmental processes (6,16). Therefore, to  
173 elucidate gene regulatory networks that underlie human cardiac development, gene  
174 expression analysis was then focused on all 216 TFs that were found to be differentially  
175 expressed during the time-course of cardiac differentiation (Fig 4A; Supplementary Table 1).  
176 Overall, 69% of these TFs have been already linked to cardiac (patho)physiological phenotypes  
177 (Supplementary Table 1). We chose to adapt an expression correlation score involving time  
178 delay (LEAP method, see Methods) to capture gene associations that are hidden by time lags  
179 (*i.e.* time delay between the mRNA expression of the source gene and the mRNA expression  
180 of its target gene). Using this method on the 216 TFs, we predicted interactions that activated  
181 or inhibited the expression of target TFs by source TFs, building a regulatory network. This  
182 gene expression-based network included 11 467 activating interactions and 11 539 inhibitory  
183 interactions (Fig 4B left panel; Supplementary Table 2). We then evaluated the biological  
184 relevance of these TF interactions, using the STRING protein-protein interaction (PPI)  
185 database to generate an undirected PPI-based network restricted to the 216 TFs (Fig 4B right  
186 panel). Interestingly, 182 TFs (84%) were found to share at least one known PPI interaction.  
187 This included interactions between TFs belonging to the same gene cluster but also,  
188 interactions between TFs from different gene clusters, suggesting coordination between TFs  
189 to regulate the successive gene expression waves.

190

191 **Fig 4. Inferred TF regulatory network governing hiPSC cardiac differentiation.**

192 (A) Normalized gene expression of the 216 TFs (identified within the top 3 000 differentially expressed  
193 genes during hiPSC cardiac differentiation) were quantified and averaged in each gene cluster. UPM:  
194 UMI per million. The number in () indicates the TF number per cluster. (B) Graphical representation of  
195 gene expression-based network and protein-protein interaction-based network (LEAP- and STRING-  
196 based method, respectively) of the same TFs as in A. Interactions between TFs of successive clusters  
197 are shown using bold lines. (C-E) Comparative quantitative analysis between both networks. (F-G)  
198 Examples of two literature-based sub-networks. Interactions uncovered in gene expression-based  
199 network are shown in blue, in PPI-based network, in yellow, and by literature curation, in black. Node  
200 colors correspond to the one of their corresponding gene cluster (as in A). Paper PMID associated with  
201 literature-based links: [A] 33803261; [B] 23417899; [C] 34901033; [D] 15253934; [E] 17011492; [F]  
202 21632880; [G] 22402664; [H] 22438573.

203

204 Comparing both networks, the gene expression-based network (LEAP-based)  
205 contained a greater amount of information than the PPI-based network (STRING-based) (Fig  
206 4B). Indeed, although both networks were generated using the same TF query list, the density  
207 (i.e. normalized averaged number of neighbors) of the gene expression-based network was  
208 5.5 fold higher, as compared to the PPI-based network. Deeper analysis showed that about  
209 100% of the nodes and 80% of the links found in the PPI-based network were also found in  
210 the gene expression-based network (Fig 4C-D). Moreover, focusing on links between  
211 successive expression clusters, more than 76% of those found in PPI-based network were also  
212 found in the gene expression-based network (Fig 4E). Further confirming the accuracy of gene  
213 expression-based strategy, sub-networks that have been well-described in the literature were  
214 also present in both networks: (1) the network composed of the main actors of pluripotency  
215 (e.g POU5F1) and early phases of cardiac development (e.g EOMES, MESP1; Fig 4F), and (2)  
216 the TF network implicated in cardiogenesis (e.g ISL1, MEF2C; Fig 4G). This validated the  
217 relevance of such expression correlation score approach taking into account time delay to  
218 comprehensively analyze TFs and their interactions throughout cardiac differentiation.  
219 Altogether, while the gene expression-based network confirmed already known and validated  
220 interactions, it also inferred 21 530 new interactions unveiling numerous new hypotheses on  
221 TF networks potentially critical for cardiac development.



222 ***IRX3 and IRX5 are involved in triggering expression of GATA4, NKX2-5, TBX5 cardiac***  
223 ***transcription factor network***

224 Leveraging this new gene expression-based network to uncover new regulation  
225 mechanisms, and based on our previous focus of interest (7,10) we evaluated IRX TF family  
226 involvement in the establishment of cardiac developmental processes. Expression levels of  
227 the 6 different *IRX* TF genes was analyzed during cardiac differentiation in the three hiPSC lines  
228 (Fig 5A). Expression of *IRX6* was undetectable and expression of *IRX1* and *IRX2* did not vary  
229 over time. Only *IRX3*, *IRX4* and *IRX5* expression increased significantly between D-1 and D30  
230 of cardiac differentiation. Interestingly, based on their expression profiles, *IRX3* and *IRX5*  
231 ranged from the earliest cardiac-specific gene cluster with an expression level that was  
232 maintained until the end of cardiac hiPSC differentiation (cluster F). This suggested a potential  
233 role for *IRX3* and *IRX5* in the early establishment of gene regulatory networks essential for  
234 cardiac fate, and beyond. In contrast, *IRX4* expression was detected in one of the latest  
235 clusters (cluster K). Therefore, we then focused on both *IRX3* and *IRX5* TFs.

236

237 **Fig 5. Exploration of the inferred IIGNT sub-network.**

238 (A) Table of TF selection criteria for the *IRX* genes family. Timecourse expression rank is the output of  
239 the timecourse package and illustrates the variation in gene expression during directed cardiac  
240 differentiation (a lower number indicating a higher variation). The Expression cluster column refers at  
241 the expression cluster in which each TF ranged as in Fig 4A. Selection and exclusion criteria are  
242 indicated in green and red respectively. (B) Potential target TFs of *IRX3* and/or *IRX5* identified in the G-  
243 to-L clusters based on the gene expression-based network. (C) Gene expression-based network of *IRX3*,  
244 *IRX5*, *GATA4*, *NKX2-5* and *TBX5* TFs. Node colors represent their corresponding clusters as in Fig 4A:  
245 *IRX3* and *IRX5* – cluster F; *GATA4* – cluster G; *NKX2-5* – cluster I; *TBX5* – cluster L. Lag is shown in days.  
246 References to literature-based links: [A] Book chapter DOI: 10.1016/B978-0-12-381332-9.00027-X.; [B]  
247 PMID: 23457256; [C] PMID: 22449847; [D] PMID: 32450132; [E] PMID: 25280899. (D) Graphs displaying  
248 activity levels of luciferase that is under the control of *GATA4* (-1800\_TSS\_+200), *NKX2-5* (-  
249 2000bp\_Start codon) and *TBX5* (-1800\_TSS\_+200) promoter constructs. Mean +/- SD; \* and \*\*:  $p <$   
250 0.05 and  $p < 0.01$ , respectively (Mann-Whitney test).

251

252 In order to investigate the role of IRX3 and IRX5 in cardiac differentiation progression,  
253 all their potential TF targets in the subsequent G to L clusters were extracted from the gene  
254 expression-based network (Fig 5B). Interestingly, the master cardiac TF genes *GATA4* (cluster  
255 G), *NKX2-5* (cluster I) and *TBX5* (cluster L) were individually found to be potential targets of  
256 both IRX3 and IRX5. It is well established that *GATA4* acts in a multiprotein complex with *NKX2-*  
257 *5* (cluster I) and *TBX5* (cluster L) cardiac TFs (6,17,18). To further explore potential new  
258 interactions, we then focused on the gene expression-based sub-network involving *IRX3*, *IRX5*,  
259 *GATA4*, *NKX2-5* and *TBX5*, referred later as IGNIte sub-network (Fig 5C). In the IGNIte sub-  
260 network, IRX3 and IRX5 were inferred as activators of *GATA4*, *NKX2-5* and *TBX5*, and  
261 confirming the literature (5,19–21), *GATA4* was inferred as activator of *NKX2-5* and both  
262 *GATA4* and *NKX2-5* were activators of *TBX5* expression.

263 In order to investigate the biological relevance of these inferred interactions, luciferase  
264 assays were conducted on *GATA4*, *NKX2-5* and *TBX5* core promoters (Fig 5D). IRX3 and IRX5  
265 proteins were, separately (fold changes 4.2 and 1.5 respectively) or together (fold change 4.5),  
266 able to bind the promoter of *GATA4* and to activate luciferase expression. A slight tendency  
267 towards potentiation of both activating effects is observable when IRX3 and IRX5 were present  
268 but was not statistically significant. On the *NKX2-5* promoter, IRX5 alone was able to activate  
269 luciferase expression (1.3-fold change), but not IRX3, suggesting that the inferred activation  
270 of *NKX2-5* by IRX3 found in the IGNIte sub-network was due to IRX5, and that the high  
271 similarity between *IRX3* and *IRX5* expression profiles caused the false-positive link to appear.  
272 Together, IRX3 and IRX5 were able to activate *NKX2-5* promoter, with a tendency towards  
273 potentiation too (fold change 1.2 between IRX5 alone and IRX3/IRX5 conditions;  $p>0.05$ ).  
274 According to the order of appearance of TFs in IGNIte sub-network, *NKX2-5* promoter  
275 activation was assessed in the combined presence of IRX3, IRX5 and *GATA4*, which showed an  
276 activator effect (1.8-fold change). Although a potentiation tendency was observed when  
277 *GATA4* was present in addition with IRX3 and IRX5, this effect was not statistically significant.  
278 On *TBX5* promoter, IRX3 and IRX5 were able to bind and activate gene expression either  
279 individually (2.7- and 1.2-fold change, respectively) or together (3.6-fold change). Potentiation  
280 of both activator effects was clearly observable and statistically significant when IRX3 and IRX5  
281 were together on the *TBX5* promoter. Finally, considering the joint expression of IRX3, IRX5,  
282 *GATA4* and *NKX2-5* from D10, we proved the activator effect of these TFs on *TBX5* promoter

283 (6.6-fold change), which is statistically increase from the IRX3/IRX5 condition (1.8-fold  
284 change). Collectively, these results biologically validated the new interactions inferred with  
285 the gene expression-based network and illustrated the progressive temporal activation of the  
286 major TFs GATA4, NKX2-5 and TBX5, by IRX3 and IRX5 during cardiac cell lineage  
287 establishment.

### 288 ***IRX3 and IRX5 physically interact with GATA4, NKX2-5 and TBX5 to control SCN5A expression***

289 As the expression of the IGNiTe sub-network members was maintained until D30 of  
290 hiPSC cardiac differentiation (Fig 6A), the functional role of IRX3, IRX5, GATA4, NKX2-5, and  
291 TBX5 as a multiprotein complex was evaluated using co-immunoprecipitation and luciferase  
292 assays in heterologous expression systems. Luciferase assays were conducted on the  
293 promoter of *SCN5A*, a known target of these TFs (7,22–25). According to the chronological  
294 order of expression of these five TFs along cardiac differentiation of hiPSCs (Fig 6A), we first  
295 investigated the role of IRX3 and IRX5. As previously described (26), IRX3 and IRX5 physically  
296 interacted (Fig 6B top panel and Supplementary Fig S3) and could cooperatively activate *the*  
297 *SCN5A* promoter (Fig 6B bottom panel). While IRX3 alone activated *the SCN5A* promoter (2.3-  
298 fold change), IRX5 potentiated its effect with a 1.5-fold change. GATA4 was able to physically  
299 interact with IRX5 but not with IRX3 (Fig 6C top panels) and when the three TFs were co-  
300 transfected, only GATA4 and IRX5 interacted, suggesting a competitive effect between IRX3  
301 and GATA4 to bind IRX5 (Fig 6C bottom left panel). Also, the addition of GATA4 potentiated  
302 (1.5-fold change) the activity of the IRX3/IRX5 couple on *SCN5A* promoter (Fig 6C bottom right  
303 panel). NKX2-5 interacted with both IRX3 and IRX5 individually (Fig 6D left panels), but again,  
304 when the four TFs were co-transfected we only observed an interaction between IRX5, GATA4,  
305 and NKX2-5, suggesting again a competition between IRX3 and IRX5, in favor of IRX5, in these  
306 interactions (Fig 6D central panel). NKX2-5 amplified (8.0-fold change) the effect of the  
307 IRX3/IRX5/GATA4 trio on the *SCN5A* promoter (Fig 6D right panels). Finally, when IRX3, IRX5,  
308 GATA4, NKX2-5 and TBX5 were co-transfected a global protein complex could be formed  
309 between IRX5, GATA4, NKX2-5 and TBX5, but not with IRX3, even if IRX3 alone was able to  
310 interact with TBX5 (Fig 6E left and central panels). However here, TBX5 slightly reduced (-1.6-  
311 fold change) the effect of the IRX3/IRX5/GATA4/NKX2-5 quartet on *SCN5A* promoter (Fig 6E  
312 right panel) suggesting a down-regulating role of TBX5 in this global complex. Collectively, we  
313 showed that following *IRX3*, *IRX5*, *GATA4*, *NKX2-5* and *TBX5* gene expression increase during

314 cardiac differentiation, the direct activation of *SCN5A* expression is under the control of a  
315 time-changing multi-TFs complex that controls the temporal expression profile of *SCN5A*.

316

317 **Fig 6. Physical and functional interactions of IRX3/IRX5/GATA4/NKX2-5/TBX5 multiprotein complex.**

318 (A) Normalized mean expression level overtime of IRX3, IRX5, GATA4, NKX2-5, TBX5 and of *SCN5A* ion  
319 channel genes. UPM: UMI per million. (B-E) Co-immunoprecipitation and luciferase results associated  
320 to the transfection of (B) IRX3 and/or IRX5, (C) IRX3, IRX5 and/or GATA4, (D) IRX3, IRX5, GATA4 and/or  
321 NKX2-5, (E) IRX3, IRX5, GATA4, NKX2-5 and/or TBX5. Immunoblots representative of the various co-  
322 immunoprecipitations and the schematic illustration of the results. Graphs display activity levels of  
323 luciferase that is under the control of the -2109/+1072 region of human *SCN5A* promoter, in the  
324 various transfection conditions. Mean +/- SEM; \* and \*\*:  $p < 0.05$  and  $p < 0.0001$ , respectively (Mann-  
325 Whitney test). See also Fig S3.

326

327 **Discussion**

328 In this study, based on a transcriptomic kinetics study on cardiac differentiation of  
329 hiPSCs, we identified the global TF regulatory network that is required for heart development.  
330 We notably identified novel time-dependent TF-gene regulations that connect *IRX3* and *IRX5*  
331 to the core cardiac *GATA4*, *NKX2-5* and *TBX5* TFs. We also found that these five TFs form  
332 protein complexes to regulate target gene expression, such as *SCN5A*. Altogether, this time-  
333 course bulk transcriptomic data provided a dynamic model relevant to identify new roles for  
334 TFs in developmental processes.

335 ***In vitro modeling of time in cardiac development***

336 This study demonstrates that hiPSC cardiac differentiation is a relevant model to study  
337 the successive steps leading to the establishment of the gene expression program during  
338 human cardiac development. To date, most studies contributing to the knowledge on heart  
339 development and TF regulation have been conducted in animal models, mainly in mice (27),  
340 as access to human embryonic cardiac tissue, is indeed very limited. If regulatory mechanisms  
341 of development are overall highly evolutionary conserved, some are human-specific (28,29).  
342 Therefore, investigation of human cardiac development also requires suitable human models.  
343 HiPSC cardiac differentiation models have proved to generate functional cardiac cells and

344 suggested that punctual time points during this differentiation might reflect some key  
345 developmental stages (7,30,31). However, fully assessing the relevance of hiPSC cardiac  
346 differentiation model to study human cardiac development, requires demonstrating that it  
347 thoroughly and accurately reproduces human cardiac development in a temporally  
348 coordinated fashion. All phenotypic changes that occur during cardiogenesis are known to be  
349 embodied by dynamic alterations in cellular transcriptome. Yet, although the ideal situation  
350 would be to compare transcriptomic changes along hiPSC differentiation to the ones occurring  
351 during human cardiac development, no public human transcriptomic dataset studying well-  
352 distributed stages across the entire cardiac development is available. In the present study, we  
353 therefore used murine cardiac transcriptomic data generated from specific stages that  
354 appropriately rang from conception to birth (14), to compare with hiPSC cardiac  
355 differentiation data. Their high level of consistency confirmed that our hiPSC cardiac  
356 differentiation model accurately reproduces cardiogenesis. An important added value of the  
357 present data is that it filled a gap of knowledge on the global gene expression changes that  
358 occur daily, between these developmental stages in human cells.

359 A major limitation of hiPSC-derived models is immaturity: cardiac cells produced by  
360 current hiPSC differentiation protocols have a fetal-like phenotype far from adult cells (32).  
361 Although this limitation does not affect the study of prenatal stages of cardiac development,  
362 obtaining mature cardiac cells would broaden the scope of these models to study later stages  
363 of development as well as aging processes.

#### 364 ***In vitro modeling of cardiac development-associated cellular diversity***

365 Cardiomyocytes require substantial cell diversity to support both the proper execution  
366 of their biological functions and their differentiation, since many signaling pathways regulating  
367 their formation are sourced from other cell types (12,13). In this study, we confirmed that  
368 hiPSC cardiac differentiation generates the cellular diversity typically reported in the human  
369 fetal heart and thus provides the opportunity to investigate regulatory mechanisms occurring  
370 between these different cardiac cell types. However, hiPSC cardiac differentiation in two  
371 dimensions does not reproduce the spatial organization of the cell types as observed in the  
372 context of a heart. The emergence of more integrated hiPSC-derived models such as cardioids  
373 (33), will therefore undoubtedly enhance our insights into transcriptional regulation between  
374 cardiac cell types.

### 375 ***Uncovering new regulatory networks using a gene expression kinetics-based strategy***

376 An original aspect of this study was the identification of expression regulations  
377 occurring between TFs in a temporal manner. For that we chose to adapt the LEAP  
378 bioinformatic tool designed for single-cell data to kinetic transcriptomic bulk data (34).  
379 Importantly, with this tool, these gene regulations are oriented, indicating not only the  
380 interaction but also which partner is expected to be the target/source. This higher level of  
381 information is important to design more efficiently confirmation experiment, and cannot be  
382 obtain in traditionally-used protein-protein interaction databases, such as STRING (35).  
383 Moreover, our strategy allowed to biologically link genes in a time-dependent manner during  
384 cardiac differentiation, and thus provided important new insights on cardiac gene regulatory  
385 networks (36). Of note, one cannot exclude that some of the inferred links may not reflect  
386 biological interactions (e.g. TF does not directly bind to an inferred target gene). Other studies  
387 embarked in different strategies to study cardiac gene regulation. For instance, Gonzalez-  
388 Teran et al. combined, PPI data associated with GATA4 and TBX5 TFs, and genetic data  
389 generated on patients presenting congenital heart diseases (CHD) to identify CHD candidate  
390 genes (37). This integrated strategy of PPI data and CHD-associated genetic data could be a  
391 relevant complementary approach of our chronological gene expression-based strategy in  
392 order to identify new CHD-associated TF regulatory networks and to offer a better  
393 understanding of cardiac disease underlying mechanisms.

### 394 ***Activation cascade of GATA4, NKX2-5, TBX5 genes triggered by IRX3 and IRX5***

395 It is well established that cardiac transcription factors regulate the expression of other  
396 TF-coding genes. For instance, *GATA4* activates *NKX2-5* expression and both *GATA4* and *NKX2-5*  
397 *5* activates *TBX5* expression (5,19–21). However, the precise molecular bases of these  
398 regulations were still to be uncovered. Using daily-generated transcriptomic data, we  
399 characterized the course of expression of these major cardiac TFs showing that, in accordance  
400 with the functional data, they are successively launched, starting with *GATA4* around day 5,  
401 followed by *NKX2-5* two days later and finally by *TBX5* two days later too. Obviously, this raised  
402 the question of how *GATA4* expression is, in the first place, launched. Using gene expression-  
403 based network we identified IRX3 and IRX5 TFs as potential activators of *GATA4* expression.  
404 Accordingly, the expression of these TFs was launched simultaneously about 1 day prior to  
405 *GATA4* expression. These TFs are of growing interest as, while most studies were performed

406 in knockout mice showing that they play redundant roles in cardiac development leading to  
407 embryonic lethality, and in postnatal electrophysiological function, their role in human cardiac  
408 function now also emerges (7,38). In this context, the present study therefore further explored  
409 and specified the role of IRX TFs in the course of human cardiac development.

#### 410 ***Exploring the functional interplay between IRX3/IRX5 and GATA4, NKX2-5, TBX5***

411 It has been shown that GATA4, NKX2-5 and TBX5 act as multiprotein complex to  
412 regulate cardiac gene expression (19). Here, we completed this knowledge by showing that  
413 IRX3 and IRX5 can also physically bind to this TF regulatory complex. Furthermore, all five TFs  
414 could physically and functionally interact on the promoter of *SCN5A* that encodes the major  
415 cardiac sodium ion channel. Accordingly, *SCN5A* expression gradually increases during hiPSC  
416 cardiac differentiation, paralleling the progressive expression establishment of the five TFs.  
417 Some of the interactions between IRX TFs and GATA4, NKX2-5 or TBX5 have previously been  
418 published. For instance, physical and functional interactions between *Irx3*, *Nkx2-5* and *Tbx5*  
419 have been shown in mice to regulate genes implicated in ventricular conduction system  
420 establishment and maturation (39). Furthermore, our group has previously demonstrated  
421 physical and functional interactions between IRX5 and GATA4 on *SCN5A* promoter (7). In this  
422 study we further detailed the complexity of the interactions between IRX3, IRX5, GATA4,  
423 NKX2-5 and TBX5, and how these TF complex compositions impact the expression of a target  
424 gene.

#### 425 ***Perspectives***

426 Altogether, this study provides a comprehensive dynamic blueprint of transcription  
427 factors that control transcriptional regulation during human cardiac development as well as a  
428 new methodological approach that may be applied to other research fields. These insights  
429 may help to further understand both pathological cardiac development leading to CHD, as  
430 well as physiological cardiac development, which is a prerequisite to emerging cardiac  
431 regenerative therapy strategies (40). Moreover, in recent years, transcription factor  
432 regulation of cardiac functions was widely supported by Genome Wide Association Studies,  
433 linking numerous common genetic variations at loci harboring TF genes to cardiac diseases  
434 ((41,42); Supplementary Table 1). Confronting the present knowledge to the one obtained  
435 from cardiac differentiation of hiPSCs reprogrammed from patients carrying such genetic

436 variants may provide important information regarding their impact on cardiac development  
437 and therefore may lead to new targets for treatment and clinical management improvement.

### 438 ***Limitations of the study***

439 We have identified several limitations in our study. First, the kinetic transcriptomic  
440 analysis has been performed using bulk-based strategy, however, the use of single-cell  
441 analysis instead would have provided us with a better overview of the cellular transcriptomic  
442 diversity. Second, the limited sample size that has been used prevented us from identifying  
443 the impact of the gender and ethnicity on transcriptomic regulation. Therefore, further studies  
444 will have to investigate if the identified TF networks (1) are activated in a cell-specific manner,  
445 and (2) whether they are specific to gender and/or ethnicity.

## 446 **Materials and Methods**

### 447 ***Reprogramming and maintenance of hiPSCs***

448 All cell lines, from 3 healthy donors, were previously characterized. The hiPSC-A (C2a  
449 in (43)) line was generated using lentivirus method while hiPSC-B (IRX5-Wt in (44);  
450 RRID:CVCL\_B5QD) and hiPSC-C (WT8288 in (45); RRID:CVCL\_B5Q5) lines were generated using  
451 Sendai virus method. hiPSC lines were maintained at 37°C, 5% CO<sub>2</sub>, 21% O<sub>2</sub> in StemMACS™  
452 iPS Brew XF Medium (Miltenyi Biotec) on culture plates coated with Matrigel® hESC-Qualified  
453 Matrix (0.05 mg/mL, Corning). At 75% confluency, cells were passaged using Gentle Cell  
454 Dissociation Reagent (STEMCELL™ Technologies).

### 455 ***Cardiac differentiation of hiPSCs***

456 Directed cardiac differentiations of hiPSCs were performed using the established  
457 matrix sandwich method (Fig 1A; (46)). Briefly, when hiPSCs reached 90% confluency, an  
458 overlay of Growth Factor Reduced Matrigel (0.033 mg/ml, BD Corning) was added.  
459 Differentiation was initiated 24h later by culturing the cells in RPMI1640 medium (Life  
460 Technologies) supplemented with B27 (without insulin, Life Technologies), 2 mM L-glutamine  
461 (Life Technologies), 1% NEAA (Life Technologies), 100 ng/mL Activin A (Miltenyi Biotec), 1X  
462 Pen/Strep (Life Technologies) and 10 ng/mL FGF2 for 24 hours. On the next day, the medium  
463 was replaced by RPMI1640 medium supplemented with B27 without insulin, 2 mM L-  
464 glutamine, 1% NEAA, 10 ng/mL BMP4 (Miltenyi Biotec), 1X Pen/Strep and 5 ng/mL FGF2 for 4



465 days. By day 5, cells were cultured in RPMI1640 medium supplemented with B27 complete  
466 (Life Technologies), 2 mM L-glutamine, 1X Pen/Strep and 1% NEAA and changed every two  
467 days until day 30. Specifically, for video analysis and immunofluorescence staining, glucose  
468 starvation was performed to obtain purified cardiomyocyte population: at day 10 the medium  
469 was replaced by Depletion medium (RPMI 1640 medium without glucose (Life Technologies)  
470 supplemented with B27 complete, and 1X Pen/Strep) for 3 days. Cells were dissociated at day  
471 13 with 10X TrypLE solution (Life Technologies) and replated in CMs medium (RPMI1640  
472 medium supplemented with B27 complete, 2 mM L-glutamine, 1X Pen/Strep, 1% NEAA)  
473 supplemented with Y-27632 Rho-kinase inhibitor (STEMCELL™ Technologies). On day 14, the  
474 medium was replaced by Depletion medium for 3 days. From day 17, cells were maintained in  
475 CMs medium.

## 476 ***Bulk transcriptomics***

### 477 *RNA extraction and sequencing*

478 For each hiPSC line, samples were harvested daily from D-1 to D30 of the cardiac  
479 differentiation protocol from three independent cardiac differentiations. Total RNA were  
480 extracted using the NucleoSpin RNA kit (MACHEREY-NAGEL) and their quality assessed by  
481 NanoDrop™ 1000 Spectrophotometer (Thermo Fisher Scientific). From D-1 to D14 samples,  
482 all cells were collected while, from D15 to D30, to obtain samples enriched with  
483 cardiomyocytes, only spontaneously beating cell clusters were collected following mechanical  
484 isolation using a needle. 3'RNA libraries were prepared by GenoBiRD core facility according to  
485 their published method (47) and sequenced on 8 individual runs on a NovaSeq 6000 or HiSeq  
486 2500 Sequencing System (Illumina).

### 487 *Primary analysis of bulk transcriptomic data*

488 Demultiplexing, alignment on GRCh38 reference genome and counting steps were  
489 conducted on each sequencing run with the Snakemake pipeline developed by the GenoBiRD  
490 core facility (47). Normalized and log-transformed expression matrices were generated using  
491 the *multiplates* function correcting potential batch effects by treating cardiac differentiation  
492 time points as replicates.

### 493 *PCA*

494 Principal Component Analysis (PCA) was performed with the R package *FactoMineR*  
495 ((48); RRID:SCR\_014602) on the entire mean-centered and log-transformed matrix.

#### 496 *Time-course gene expression analysis*

497 Genes with significant expression variation between the different cardiac  
498 differentiation time-points (indicated as Differentially Expressed Genes; DEG) were identified  
499 by multivariate empirical Bayes statistics using the R package *timecourse* ((49);  
500 RRID:SCR\_000077) applied to the entire log-transformed matrix. We selected the top 3 000  
501 DEG based on their highest Hotelling  $\tilde{T}^2$  statistics. The same method was used to select genes  
502 with significant expression variation during murine cardiac development from a published  
503 transcriptomic dataset (14). When necessary, human and murine orthologous gene names  
504 were identified using the R package *biomaRt* ((50); RRID:SCR\_019214) and Ensembl databases.

#### 505 *Clustering and heatmap*

506 DEG were grouped into clusters, based on their expression level variation across the  
507 288 samples, using the R function *k-means* set on 2 000 iterations, and visualized with the R  
508 package *ComplexHeatmap* ((51); RRID:SCR\_017270).

#### 509 *Gene Ontology analyses*

510 Gene Ontology (GO) analysis was performed using the R package *ClusterProfiler* ((52);  
511 RRID:SCR\_016884), based on GO Biological Process terms from org.Hs.eg.db\_3.14.0 and  
512 org.Mm.eg.db\_3.14.0 databases for human and mouse annotations, as appropriate.  
513 Significantly enriched (bonferroni-corrected p-value < 0.05) biological processes, as compared  
514 to reference transcriptome, and with a Gene Set Size (GSSize) between 10 and 500, were  
515 considered for further analysis. The 15 GO terms with the lowest corrected p-value were  
516 visualized with treeplot.

#### 517 *Network construction and analysis*

518 For each hiPSC line, the gene regulatory network was inferred using the R package  
519 *LEAP* (Lag-based Expression Association for Pseudotime-series; Specht and Li, 2017), based on  
520 the average from the log-transform data of triplicate cardiac differentiations. Cardiac  
521 differentiation time points were used to rank samples as required by the *LEAP* tool. The  
522 *max\_lag\_prop* parameter was set to 1/10, meaning that, at most, 3-day windows were used

523 to calculate the maximum absolute correlation (MAC) score. Only links with a significant MAC  
524 score (determined by a permutation test;  $p$ -value < 0.05) and related to a non-null time delay  
525 were considered. Links with a positive correlation score were interpreted as activation  
526 relationships and those with a negative correlation score as repression relationships. STRING  
527 software (35) was used to obtain information on physical and functional interactions between  
528 proteins of interest, with a *minimum required interaction score* of 0.4. Nodes without any  
529 interaction were excluded. STRING-based or LEAP-based interactions were processed using  
530 Cytoscape 3.9.1 for network reconstruction ((53); RRID:SCR\_003032). Networks parameters  
531 were obtained using the *Analyze network* function.

## 532 ***Single-cell transcriptomic***

### 533 *Single-cell RNA-seq data generation*

534 Cells at D30 of hiPSC-A cardiac differentiation were harvested from three distinct  
535 beating wells, dissociated, using the Multi Tissue Dissociation Kit 3 (Miltenyi Biotec), and  
536 pooled. This experiment was performed in duplicates. Cell suspensions were filtered on a 40  
537  $\mu$ m Flowmi<sup>®</sup> Cell Strainer, counted and cell viability was assessed (viability was 92% for the  
538 first experiment and 94% for the second). For each replicate, single-cell droplet libraries were  
539 generated from 16 000 cells with the Chromium Single Cell 3' GEM, Library & Gel Bead Kit v3  
540 (10X Genomics). After qPCR quantification, libraries were pooled and sequenced on a single  
541 run, on a NovaSeq 6000 Sequencing System (Illumina), providing a read depth of >20,000 read  
542 pairs per cell, according to manufacturer's instructions.

### 543 *Primary analysis of single-cell transcriptomic data*

544 Data were processed using *cellranger* 4.0.0 (10X Genomics). First, demultiplexing of  
545 *raw base call* files into FASTQ files was accomplished using *cellranger mkfastq* function.  
546 Second, alignment on GRCh38 reference genome, filtering and counting steps were  
547 performed separately on each replicate with *cellranger count* function. Lastly, aggregation  
548 with normalization of duplicates was performed using *cellranger aggr* function.

### 549 *Secondary analysis of single-cell transcriptomic data*

550 The gene expression matrix was analyzed using the R package *Seurat* ((54);  
551 RRID:SCR\_016341). Doublets were identified and removed using the R package *DoubletFinder*

552 ((55); RRID:SCR\_018771), assuming a 7.5% doublet formation rate. Also, only cells with 200 to  
553 5 000 detected features and with <25% reads aligned to mitochondrial genes were selected  
554 for further analysis. After normalization, unwanted sources of intercellular variations such as  
555 number of detected genes or differences between cell cycle phases were regressed using the  
556 *ScaleData* function. A principal component analysis was then performed using the 2 000 most  
557 variable genes according to the *FindVariableFeatures* function and the first 10 components  
558 were used to calculate the UMAP. Cell-type labelling was performed using published single-  
559 cell RNA-seq data from a human fetal heart as a reference (4). Cell-type labels from reference  
560 were automatically transferred after cell-to-cell matching at the individual cell level using the  
561 R package *CellID* (56).

## 562 ***Muscle motion***

563 hiPSC-CMs were filmed after glucose starvation at D30 in routine culture condition  
564 (37°C, 5% CO<sub>2</sub>), without electrical stimulation, using Nikon A1 RSI confocal microscope with  
565 X20 Dry N.A 0.75 objective. MUSCLEMOTION software (*Gaussian Blur*: No; *Speed Window*: 5;  
566 *Noise Reduction*: Yes; *Automatic Reference Frame Detection*: Yes; *Transient analysis*: Yes; (57))  
567 was used to obtain contraction traces from 120fps videos. Contraction profiles were analyzed  
568 using homemade R pipeline.

## 569 ***HEK293 cell culture and transfection***

570 HEK293 cells were maintained at 37°C, 5% CO<sub>2</sub>, in DMEM media with 10% FBS, 5% L-  
571 Glutamine and 5% Pen/Strep. Cells were plated in 24-well plate or 6-well plate and transfected  
572 next day using FuGENE® 6 (Promega, E2691). For luciferase assay, cells were transfected with  
573 a total of 2µg of plasmid including: (1) pGL2-Renilla plasmid, (2) plasmid containing Firefly  
574 luciferase gene upstream promoter of interest and (3) expression plasmids coding for proteins  
575 of interest (Table 1). DNA quantities were equalized in each condition using empty pcDNA3.1  
576 plasmid. Media was changed 24h post transfection, and cell lysates performed 48h post  
577 transfection. For co-immunoprecipitation, cells were transfected only with expression  
578 plasmids prior lysis 24h post transfection.

## 579 ***Co-immunoprecipitation***

580 *Protein sample extraction and quantification*

581 Previously transfected HEK293 cells were lysed (4°C, 15min, with rotation) in lysis  
582 buffer: 1% TritonX-100, 100mM NaCl, 50mM Tris-HCl, 1mM EGTA, 1mM Na<sub>3</sub>VO<sub>4</sub>, 50mM NaF,  
583 1mM phenylmethylsulfonyl fluoride, protease inhibitors cocktail (Sigma-Aldrich, P8340), and  
584 centrifuged at 15 000g (4°C, 15 min). Protein quantification was carried out using Pierce™ BCA  
585 Protein Assay Kit (Thermo Fisher, 23225).

#### 586 Bead-antibody complexes preparation

587 Co-Immunoprecipitation was performed using Dynabeads® Protein G (Invitrogen,  
588 10004D) and DynaMag™-2 Magnet (Invitrogen, 12321D). First, 12.5µL of beads were  
589 conjugated (Room temperature (RT), 40min, with rotation) with 2µg of antibody (Table 1). The  
590 bead-antibody complexes were cross-linked (RT, 30min, with rotation) using 5,4mg/ml  
591 dimethyl pimelimidate (ThermoScientific, 21667). The cross-linking was quenched with 50mM  
592 Tris pH7.5 (RT, 15min, with rotation). Beads were washed using (1) PBS 1X, (2) 0.1M citrate  
593 pH3.1, (3) Na-phosphate solutions, then incubated in PBS 0.5% NaDOC (RT, 15min, with  
594 rotation) and were finally washed with lysis buffer.

#### 595 Immunoprecipitation and western blotting analysis

596 Bead-antibody complexes were incubated with 1mg protein samples (4°C, 2h, with  
597 rotation). Supernatant was then discarded and beads were washed 3 times with lysis buffer.  
598 Beads-protein complexes were then heated (50°C, 10min) in NuPAGE™ LDS Sample Buffer (4X)  
599 (Invitrogen, NP0008). Samples were magnetized prior supernatants collection and incubated  
600 (70°C, 10min) in NuPAGE® Sample Reducing Agent 10X (Invitrogen, NP0009). Finally, samples  
601 were loaded onto a 4–15% precast polyacrylamide gel (Biorad, 4568083) together with 10µg  
602 of total protein used as control. Revelation was performed using corresponding antibody  
603 (Table 1) with ECL Clarity Max (Biorad, 1705062). Images were acquired with ChemiDoc  
604 camera (Biorad) and analysed using Image Lab Software (Biorad).

#### 605 Table 1. Plasmids and antibodies references

| Plasmid Name                 | Sequence/Reference  | Supplier         |
|------------------------------|---------------------|------------------|
| Nkx2.5 promoter - FireflyLuc | -2000bp_Start codon | Vectorbuilder    |
| GATA4 promoter - FireflyLuc  | -1800_TSS_+200      | Vectorbuilder    |
| Tbx5 promoter - FireflyLuc   | -1800_TSS_+200      | Vectorbuilder    |
| SCN5A promoter - FireflyLuc  | -2109_TSS_+1072     | Adapted from (7) |
| pGL2 Renilla luciferase      |                     | Promega          |
| IRX5                         | RG234228            | Origene          |

| IRX3                      | RG205722  | Origene     |                          |
|---------------------------|-----------|-------------|--------------------------|
| GATA4                     | RC210945  | Origene     |                          |
| Tbx5                      | SC120046  | Origene     |                          |
| Nkx2.5                    | SC122678  | Origene     |                          |
| pcDNA3.1                  |           | Invitrogen  |                          |
| Antibody                  | Reference | RRID        | Supplier                 |
| anti-GFP                  | TA150041  | AB_2622256  | Origene                  |
| anti-Myc Tag              | 05-724    | AB_309938   | Merck Millipore          |
| anti-IRX5                 | sc-81102  | AB_1124818  | Santa Cruz               |
| anti-IRX3                 | sc-166877 | AB_10609525 | Santa Cruz               |
| anti-GATA4                | sc-25310  | AB_627667   | Santa Cruz               |
| anti-Tbx5                 | sc-515536 |             | Santa Cruz               |
| anti-Nkx2.5               | sc-8697   | AB_650280   | Santa Cruz               |
| anti-Troponin I           | sc-15368  | AB_793465   | Santa Cruz               |
| Mouse IgG Isotype Control | 02-6502   | AB_2532951  | Thermo Fisher Scientific |

#### 606 ***Luciferase assay***

607 Cells were lysed according to the manufacturer recommendations and luciferase  
608 activity was measured using Dual Luciferase reporter assay system (Promega, E1910) with  
609 Varioskan™ LUX microplate reader (Thermofisher). Mann-Whitney statistical tests were  
610 performed with Prism software (v8.0.1).

#### 611 ***Immunofluorescence***

612 Cells were fixed with 4% paraformaldehyde for 15min at room temperature (RT) in  
613 Matrigel®-coated  $\mu$ -Slide 8 Well (IBIDI) prior permeabilization with 0.1% PBS-BSA 1% Saponin  
614 (RT, 15min) and blocking with 3% PBS-BSA (RT, 30min). Cells were then incubated with primary  
615 antibodies (dilution 1/250) in PBS 0.1% BSA 0.1% Saponin solution (4°C, overnight). Finally,  
616 cells were washed and incubated with secondary antibodies and DAPI (RT, 1h) and stored in  
617 0.5% paraformaldehyde (4°C). Images were acquired using an inverted epifluorescence  
618 microscope (Zeiss Axiovert 200 M).

#### 619 ***TF and cardiac phenotypes association***

620 The association between cardiac phenotypes and transcription factors was performed  
621 using the DisGeNET (v7.0; (58)) and NHGRI-EBI GWAS Catalog (59) databases, filtering on  
622 cardiovascular traits, which were then manually validated.

## 623 **Acknowledgments**

624 We are most grateful to the Genomics Core Facility GenoA, member of Biogenouest  
625 and France Genomique and to the Bioinformatics Core Facility BiRD, member of Biogenouest  
626 and Institut Français de Bioinformatique (IFB) (ANR-11-INBS-0013) for the use of their  
627 resources and their technical support. We acknowledge the IBISA MicroPICell facility  
628 (Biogenouest), member of the national infrastructure France-Bioimaging supported by the  
629 French national research agency (ANR-10-INBS-04). We thank Jérôme Montnach for helping  
630 with muscle contraction analyses, Elise Douillard and Stéphane Minvielle for technical help  
631 with single-cell experiments, and Béatrice Guyomarch for helpful discussions on statistical  
632 analyses.

## 633 **Fundings**

634 B.C. is laureate of fellowships from the Fondation pour la Recherche Médicale (FRM,  
635 PBR201810007614) and the Fondation Genavie. R.C. is laureate of fellowship from the Fonds  
636 Marion Elizabeth Brancher. This work was funded by grants from The National Research  
637 Agency (HEART iPS ANR-15-CE14-0019-01), from the *Fédération Française de Cardiologie*, and  
638 from International Incoming Fellowship FP7-PEOPLE-2012-IIF [PIIF-GA-2012-331436] to N.G,  
639 and by a grant from The French Regional Council of Pays de la Loire (RFI project VaCaRMe).

## 640 **Author contributions**

641 Conceptualization, R.C., B.C., R.R., P.L., N.G. and G.L., Data curation, R.C., B.C. and A.G.,  
642 Formal Analysis, R.C. and B.C., Funding acquisition, R.R., P.L., N.G. and G.L., Investigation, R.C.,  
643 B.C., A.G. and V.F., Methodology, R.C., B.C., A.G., N.G. and G.L., Project administration, R.R.,  
644 P.L., N.G. and G.L., Software, R.C., B.C. and P.O., Supervision, J.P., R.R., P.L., N.G. and G.L.,  
645 Validation, R.C., B.C., A.G., V.F., J.P., R.R., P.L., N.G. and G.L., Visualization, R.C., B.C., Writing –  
646 original draft, R.C., B.C., A.G., V.F., J.P., R.R., P.L., N.G. and G.L.

## 647 **Declaration of interests**

648 The authors declare no competing interests.

## 649 **Data and code availability**

650           The authors declare that all data supporting the findings of this study are available  
651 within the article and its supplementary information files. Bulk and single-cell transcriptomic  
652 data are available in ArrayExpress database at EMBL-EBI  
653 (<https://www.ebi.ac.uk/arrayexpress>) under accession number E-MTAB-11822 and E-MTAB-  
654 11817, respectively. All data will be publicly available as of the date of publication. All original  
655 code have been deposited at Gitlab (<https://gitlab.univ-nantes.fr/E132534J/cardiff.git>) and  
656 will be publicly available as of the date of publication. Any additional information required to  
657 reanalyze the data reported in this work is available from the lead contact upon reasonable  
658 request.



## 659 **References**

- 660 1. Meilhac SM, Buckingham ME. The deployment of cell lineages that form the mammalian  
661 heart. *Nat Rev Cardiol.* 2018 Nov;15(11):705–24.
- 662 2. Vincent SD, Buckingham ME. How to make a heart: the origin and regulation of cardiac  
663 progenitor cells. *Curr Top Dev Biol.* 2010;90:1–41.
- 664 3. Postma AV, Christoffels VM, Bezzina CR. Developmental aspects of cardiac  
665 arrhythmogenesis. *Cardiovasc Res.* 2011 Jul 15;91(2):243–51.
- 666 4. Asp M, Giacomello S, Larsson L, Wu C, Fürth D, Qian X, et al. A Spatiotemporal Organ-Wide  
667 Gene Expression and Cell Atlas of the Developing Human Heart. *Cell.* 2019 Dec  
668 12;179(7):1647-1660.e19.
- 669 5. Bruneau BG. Signaling and transcriptional networks in heart development and  
670 regeneration. *Cold Spring Harb Perspect Biol.* 2013 Mar 1;5(3):a008292.
- 671 6. Luna-Zurita L, Stirnimann CU, Glatt S, Kaynak BL, Thomas S, Baudin F, et al. Complex  
672 Interdependence Regulates Heterotypic Transcription Factor Distribution and Coordinates  
673 Cardiogenesis. *Cell.* 2016 Feb 25;164(5):999–1014.
- 674 7. Al Sayed ZR, Canac R, Cimarosti B, Bonnard C, Gourraud JB, Hamamy H, et al. Human  
675 model of IRX5 mutations reveals key role for this transcription factor in ventricular  
676 conduction. *Cardiovasc Res.* 2021 Jul 27;117(9):2092–107.
- 677 8. Bruneau BG, Bao ZZ, Fatkin D, Xavier-Neto J, Georgakopoulos D, Maguire CT, et al.  
678 Cardiomyopathy in *Irx4*-deficient mice is preceded by abnormal ventricular gene  
679 expression. *Mol Cell Biol.* 2001 Mar;21(5):1730–6.
- 680 9. Costantini DL, Arruda EP, Agarwal P, Kim KH, Zhu Y, Zhu W, et al. The Homeodomain  
681 Transcription Factor *Irx5* Establishes the Mouse Cardiac Ventricular Repolarization  
682 Gradient. *Cell.* 2005 Oct 21;123(2):347–58.
- 683 10. Gaborit N, Sakuma R, Wylie JN, Kim KH, Zhang SS, Hui CC, et al. Cooperative and  
684 antagonistic roles for *Irx3* and *Irx5* in cardiac morphogenesis and postnatal physiology.  
685 *Dev Camb Engl.* 2012 Nov;139(21):4007–19.
- 686 11. Zhang SS, Kim KH, Rosen A, Smyth JW, Sakuma R, Delgado-Olguín P, et al. Iroquois  
687 homeobox gene 3 establishes fast conduction in the cardiac His–Purkinje network. *Proc*  
688 *Natl Acad Sci U S A.* 2011 Aug 16;108(33):13576–81.
- 689 12. Litviňuková M, Talavera-López C, Maatz H, Reichart D, Worth CL, Lindberg EL, et al. Cells  
690 of the adult human heart. *Nature.* 2020 Dec;588(7838):466–72.
- 691 13. Meilhac SM. Cardiac growth I: Cardiomyocyte proliferation. *ESC Textb Cardiovasc Dev.*  
692 2018;75.

- 693 14. Li X, Martinez-Fernandez A, Hartjes KA, Kocher JPA, Olson TM, Terzic A, et al.  
694 Transcriptional atlas of cardiogenesis maps congenital heart disease interactome. *Physiol*  
695 *Genomics*. 2014 Jul 1;46(13):482–95.
- 696 15. DeLaughter DM, Bick AG, Wakimoto H, McKean D, Gorham JM, Kathiriya IS, et al. Single-  
697 Cell Resolution of Temporal Gene Expression during Heart Development. *Dev Cell*. 2016  
698 Nov 21;39(4):480–90.
- 699 16. Ng AHM, Khoshakhlagh P, Rojo Arias JE, Pasquini G, Wang K, Swiersy A, et al. A  
700 comprehensive library of human transcription factors for cell fate engineering. *Nat*  
701 *Biotechnol*. 2021 Apr;39(4):510–9.
- 702 17. Ang YS, Rivas RN, Ribeiro AJS, Srivas R, Rivera J, Stone NR, et al. Disease Model of GATA4  
703 Mutation Reveals Transcription Factor Cooperativity in Human Cardiogenesis. *Cell*. 2016  
704 Dec 15;167(7):1734-1749.e22.
- 705 18. Durocher D, Charron F, Warren R, Schwartz RJ, Nemer M. The cardiac transcription factors  
706 Nkx2-5 and GATA-4 are mutual cofactors. *EMBO J*. 1997 Sep 15;16(18):5687–96.
- 707 19. McCulley DJ, Black BL. Transcription factor pathways and congenital heart disease. *Curr*  
708 *Top Dev Biol*. 2012;100:253–77.
- 709 20. Nemer G, Nemer M. GATA4 in Heart Development and Disease. *Heart Dev Regen*. 2010  
710 Dec 31;599–616.
- 711 21. Waardenberg AJ, Ramialison M, Bouveret R, Harvey RP. Genetic Networks Governing  
712 Heart Development. *Cold Spring Harb Perspect Med*. 2014 Nov 1;4(11):a013839.
- 713 22. Arnolds DE, Liu F, Fahrenbach JP, Kim GH, Schillinger KJ, Smemo S, et al. TBX5 drives Scn5a  
714 expression to regulate cardiac conduction system function. *J Clin Invest*. 2012  
715 Jul;122(7):2509–18.
- 716 23. Briggs LE, Takeda M, Cuadra AE, Wakimoto H, Marks MH, Walker AJ, et al. Perinatal Loss  
717 of Nkx2-5 Results in Rapid Conduction and Contraction Defects. *Circ Res*. 2008 Sep  
718 12;103(6):580–90.
- 719 24. Koizumi A, Sasano T, Kimura W, Miyamoto Y, Aiba T, Ishikawa T, et al. Genetic defects in a  
720 His-Purkinje system transcription factor, IRX3, cause lethal cardiac arrhythmias. *Eur Heart*  
721 *J*. 2016 07;37(18):1469–75.
- 722 25. Tarradas A, Pinsach-Abuin ML, Mackintosh C, Llorà-Batlle O, Pérez-Serra A, Batlle M, et al.  
723 Transcriptional regulation of the sodium channel gene (SCN5A) by GATA4 in human heart.  
724 *J Mol Cell Cardiol*. 2017 Jan;102:74–82.
- 725 26. He W, Jia Y, Takimoto K. Interaction between transcription factors Iroquois proteins 4 and  
726 5 controls cardiac potassium channel Kv4.2 gene transcription. *Cardiovasc Res*. 2009 Jan  
727 1;81(1):64–71.

- 728 27. Krishnan A, Samtani R, Dhanantwari P, Lee E, Yamada S, Shiota K, et al. A detailed  
729 comparison of mouse and human cardiac development. *Pediatr Res.* 2014 Dec;76(6):500–  
730 7.
- 731 28. Anzai T, Yamagata T, Uosaki H. Comparative Transcriptome Landscape of Mouse and  
732 Human Hearts. *Front Cell Dev Biol.* 2020;8:268.
- 733 29. Olson EN, Srivastava D. Molecular pathways controlling heart development. *Science.* 1996  
734 May 3;272(5262):671–6.
- 735 30. Kathiriya IS, Rao KS, Iacono G, Devine WP, Blair AP, Hota SK, et al. Modeling Human TBX5  
736 Haploinsufficiency Predicts Regulatory Networks for Congenital Heart Disease. *Dev Cell.*  
737 2021 Feb 8;56(3):292-309.e9.
- 738 31. Wamstad JA, Alexander JM, Truty RM, Shrikumar A, Li F, Eilertson KE, et al. Dynamic and  
739 Coordinated Epigenetic Regulation of Developmental Transitions in the Cardiac Lineage.  
740 *Cell.* 2012 Sep 28;151(1):206–20.
- 741 32. Yoshida Y, Yamanaka S. Induced Pluripotent Stem Cells 10 Years Later: For Cardiac  
742 Applications. *Circ Res.* 2017 Jun 9;120(12):1958–68.
- 743 33. Hofbauer P, Jahnel SM, Papai N, Giesshammer M, Deyett A, Schmidt C, et al. Cardioids  
744 reveal self-organizing principles of human cardiogenesis. *Cell.* 2021 Jun 10;184(12):3299-  
745 3317.e22.
- 746 34. Specht AT, Li J. LEAP: constructing gene co-expression networks for single-cell RNA-  
747 sequencing data using pseudotime ordering. *Bioinforma Oxf Engl.* 2017 Mar 1;33(5):764–  
748 6.
- 749 35. Szklarczyk D, Gable AL, Lyon D, Junge A, Wyder S, Huerta-Cepas J, et al. STRING v11:  
750 protein-protein association networks with increased coverage, supporting functional  
751 discovery in genome-wide experimental datasets. *Nucleic Acids Res.* 2019 Jan  
752 8;47(D1):D607–13.
- 753 36. Wang Y, Yi N, Hu Y, Zhou X, Jiang H, Lin Q, et al. Molecular Signatures and Networks of  
754 Cardiomyocyte Differentiation in Humans and Mice. *Mol Ther Nucleic Acids.* 2020 Sep  
755 4;21:696–711.
- 756 37. Gonzalez-Teran B, Pittman M, Felix F, Thomas R, Richmond-Buccola D, Hüttenhain R, et al.  
757 Transcription factor protein interactomes reveal genetic determinants in heart disease.  
758 *Cell.* 2022 Mar 3;185(5):794-814.e30.
- 759 38. Bonnard C, Strobl AC, Shboul M, Lee H, Merriman B, Nelson SF, et al. Mutations in IRX5  
760 impair craniofacial development and germ cell migration via SDF1. *Nat Genet.* 2012 May  
761 13;44(6):709–13.
- 762 39. Kimura Y, Aiba T, Sasano T, Furukawa T, Kusano K, Shimizu W. IRX3 variant as a modifier  
763 of Brugada syndrome with frequent ventricular fibrillation. *Hear Case Rep.* 2016 Aug  
764 2;2(6):465–8.

- 765 40. Rowton M, Guzzetta A, Rydeen AB, Moskowitz IP. Control of cardiomyocyte  
766 differentiation timing by intercellular signaling pathways. *Semin Cell Dev Biol.* 2021  
767 Oct;118:94–106.
- 768 41. Barc J, Tadros R, Glinge C, Chiang DY, Jouni M, Simonet F, et al. Genome-wide association  
769 analyses identify new Brugada syndrome risk loci and highlight a new mechanism of  
770 sodium channel regulation in disease susceptibility. *Nat Genet.* 2022 Mar;54(3):232–9.
- 771 42. Roselli C, Chaffin MD, Weng LC, Aeschbacher S, Ahlberg G, Albert CM, et al. Multi-ethnic  
772 genome-wide association study for atrial fibrillation. *Nat Genet.* 2018 Sep;50(9):1225–33.
- 773 43. Si-Tayeb K, Noto FK, Nagaoka M, Li J, Battle MA, Duris C, et al. Highly efficient generation  
774 of human hepatocyte-like cells from induced pluripotent stem cells. *Hepatology* Baltim Md.  
775 2010 Jan;51(1):297–305.
- 776 44. Canac R, Caillaud A, Cimarosti B, Girardeau A, Hamamy H, Reversade B, et al. Generation  
777 of three human induced pluripotent stem cell lines with IRX5 knockout and knockin  
778 genetic editions using CRISPR-Cas9 system. *Stem Cell Res.* 2022 Jan;58:102627.
- 779 45. Girardeau A, Atticus D, Canac R, Cimarosti B, Caillaud A, Chariou C, et al. Generation of  
780 human induced pluripotent stem cell lines from four unrelated healthy control donors  
781 carrying European genetic background. *Stem Cell Res.* 2021 Dec 28;59:102647.
- 782 46. Es-Salah-Lamoureux Z, Jouni M, Malak OA, Belbachir N, Al Sayed ZR, Gandon-Renard M,  
783 et al. HIV-Tat induces a decrease in IKr and IKs via reduction in phosphatidylinositol-(4,5)-  
784 bisphosphate availability. *J Mol Cell Cardiol.* 2016 Oct;99:1–13.
- 785 47. Charpentier E, Cornec M, Dumont S, Meistermann D, Bordron P, David L, et al. 3'RNA  
786 sequencing for robust and low-cost gene expression profiling. *Protoc Exch.* 2021 Jan 28;
- 787 48. Lê S, Josse J, Husson F. FactoMineR: an R package for multivariate analysis. *J Stat Softw.*  
788 2008;25:1–18.
- 789 49. Tai YC. timecourse: Statistical Analysis for Developmental Microarray Time Course Data  
790 [Internet]. Bioconductor version: Release (3.14); 2022 [cited 2022 Apr 26]. Available from:  
791 <https://bioconductor.org/packages/timecourse/>
- 792 50. Durinck S, Spellman PT, Birney E, Huber W. Mapping identifiers for the integration of  
793 genomic datasets with the R/Bioconductor package biomaRt. *Nat Protoc.* 2009;4(8):1184–  
794 91.
- 795 51. Gu Z, Eils R, Schlesner M. Complex heatmaps reveal patterns and correlations in  
796 multidimensional genomic data. *Bioinforma Oxf Engl.* 2016 Sep 15;32(18):2847–9.
- 797 52. Wu T, Hu E, Xu S, Chen M, Guo P, Dai Z, et al. clusterProfiler 4.0: A universal enrichment  
798 tool for interpreting omics data. *Innov N Y N.* 2021 Aug 28;2(3):100141.
- 799 53. Shannon P, Markiel A, Ozier O, Baliga NS, Wang JT, Ramage D, et al. Cytoscape: a software  
800 environment for integrated models of biomolecular interaction networks. *Genome Res.*  
801 2003 Nov;13(11):2498–504.

- 802 54. Stuart T, Butler A, Hoffman P, Hafemeister C, Papalexi E, Mauck WM, et al. Comprehensive  
803 Integration of Single-Cell Data. *Cell*. 2019 Jun 13;177(7):1888-1902.e21.
- 804 55. McGinnis CS, Murrow LM, Gartner ZJ. DoubletFinder: Doublet Detection in Single-Cell RNA  
805 Sequencing Data Using Artificial Nearest Neighbors. *Cell Syst*. 2019 Apr 24;8(4):329-  
806 337.e4.
- 807 56. Cortal A, Martignetti L, Six E, Rausell A. Gene signature extraction and cell identity  
808 recognition at the single-cell level with Cell-ID. *Nat Biotechnol*. 2021 Sep;39(9):1095–102.
- 809 57. Sala L, van Meer BJ, Tertoolen LGJ, Bakkers J, Bellin M, Davis RP, et al. MUSCLEMOTION: A  
810 Versatile Open Software Tool to Quantify Cardiomyocyte and Cardiac Muscle Contraction  
811 In Vitro and In Vivo. *Circ Res*. 2018 02;122(3):e5–16.
- 812 58. Piñero J, Ramírez-Anguita JM, Saüch-Pitarch J, Ronzano F, Centeno E, Sanz F, et al. The  
813 DisGeNET knowledge platform for disease genomics: 2019 update. *Nucleic Acids Res*. 2020  
814 Jan 8;48(D1):D845–55.
- 815 59. Buniello A, MacArthur JAL, Cerezo M, Harris LW, Hayhurst J, Malangone C, et al. The  
816 NHGRI-EBI GWAS Catalog of published genome-wide association studies, targeted arrays  
817 and summary statistics 2019. *Nucleic Acids Res*. 2019 Jan 8;47(D1):D1005–12.
- 818

819 **Supplemental information titles and legends**

820 **Fig S1 – Transcriptomic signatures of cell types generated by hiPSC cardiac differentiation.**

821 Heatmap displaying expression levels of the top 5 markers of each cell population found in Fig  
822 1D. Markers were identified using the FindAllMarkers function from the R package Seurat.

823

824 **Fig S2 – Expression profile and functional annotation of the top 3 000 differentially**  
825 **expressed genes during murine cardiac development, and comparison with hiPSC cardiac**  
826 **differentiation gene expression dataset.**

827 For each cluster, average gene expression level during murine cardiac development (left panel  
828 for each cluster) and their human orthologs during hiPSC cardiac differentiation (right panel  
829 for each cluster) are shown. Replicates of gene expression levels were averaged for murine  
830 data (n=3 to n=6 per timepoint, depending on the stage) and hiPSC cardiac differentiation (n=3  
831 per hiPSC line and per timepoint). The 15 most significantly related GO terms are displayed on  
832 the middle panel for each cluster.

833

834 **Fig S3 – Original western blots related to Fig 6.**

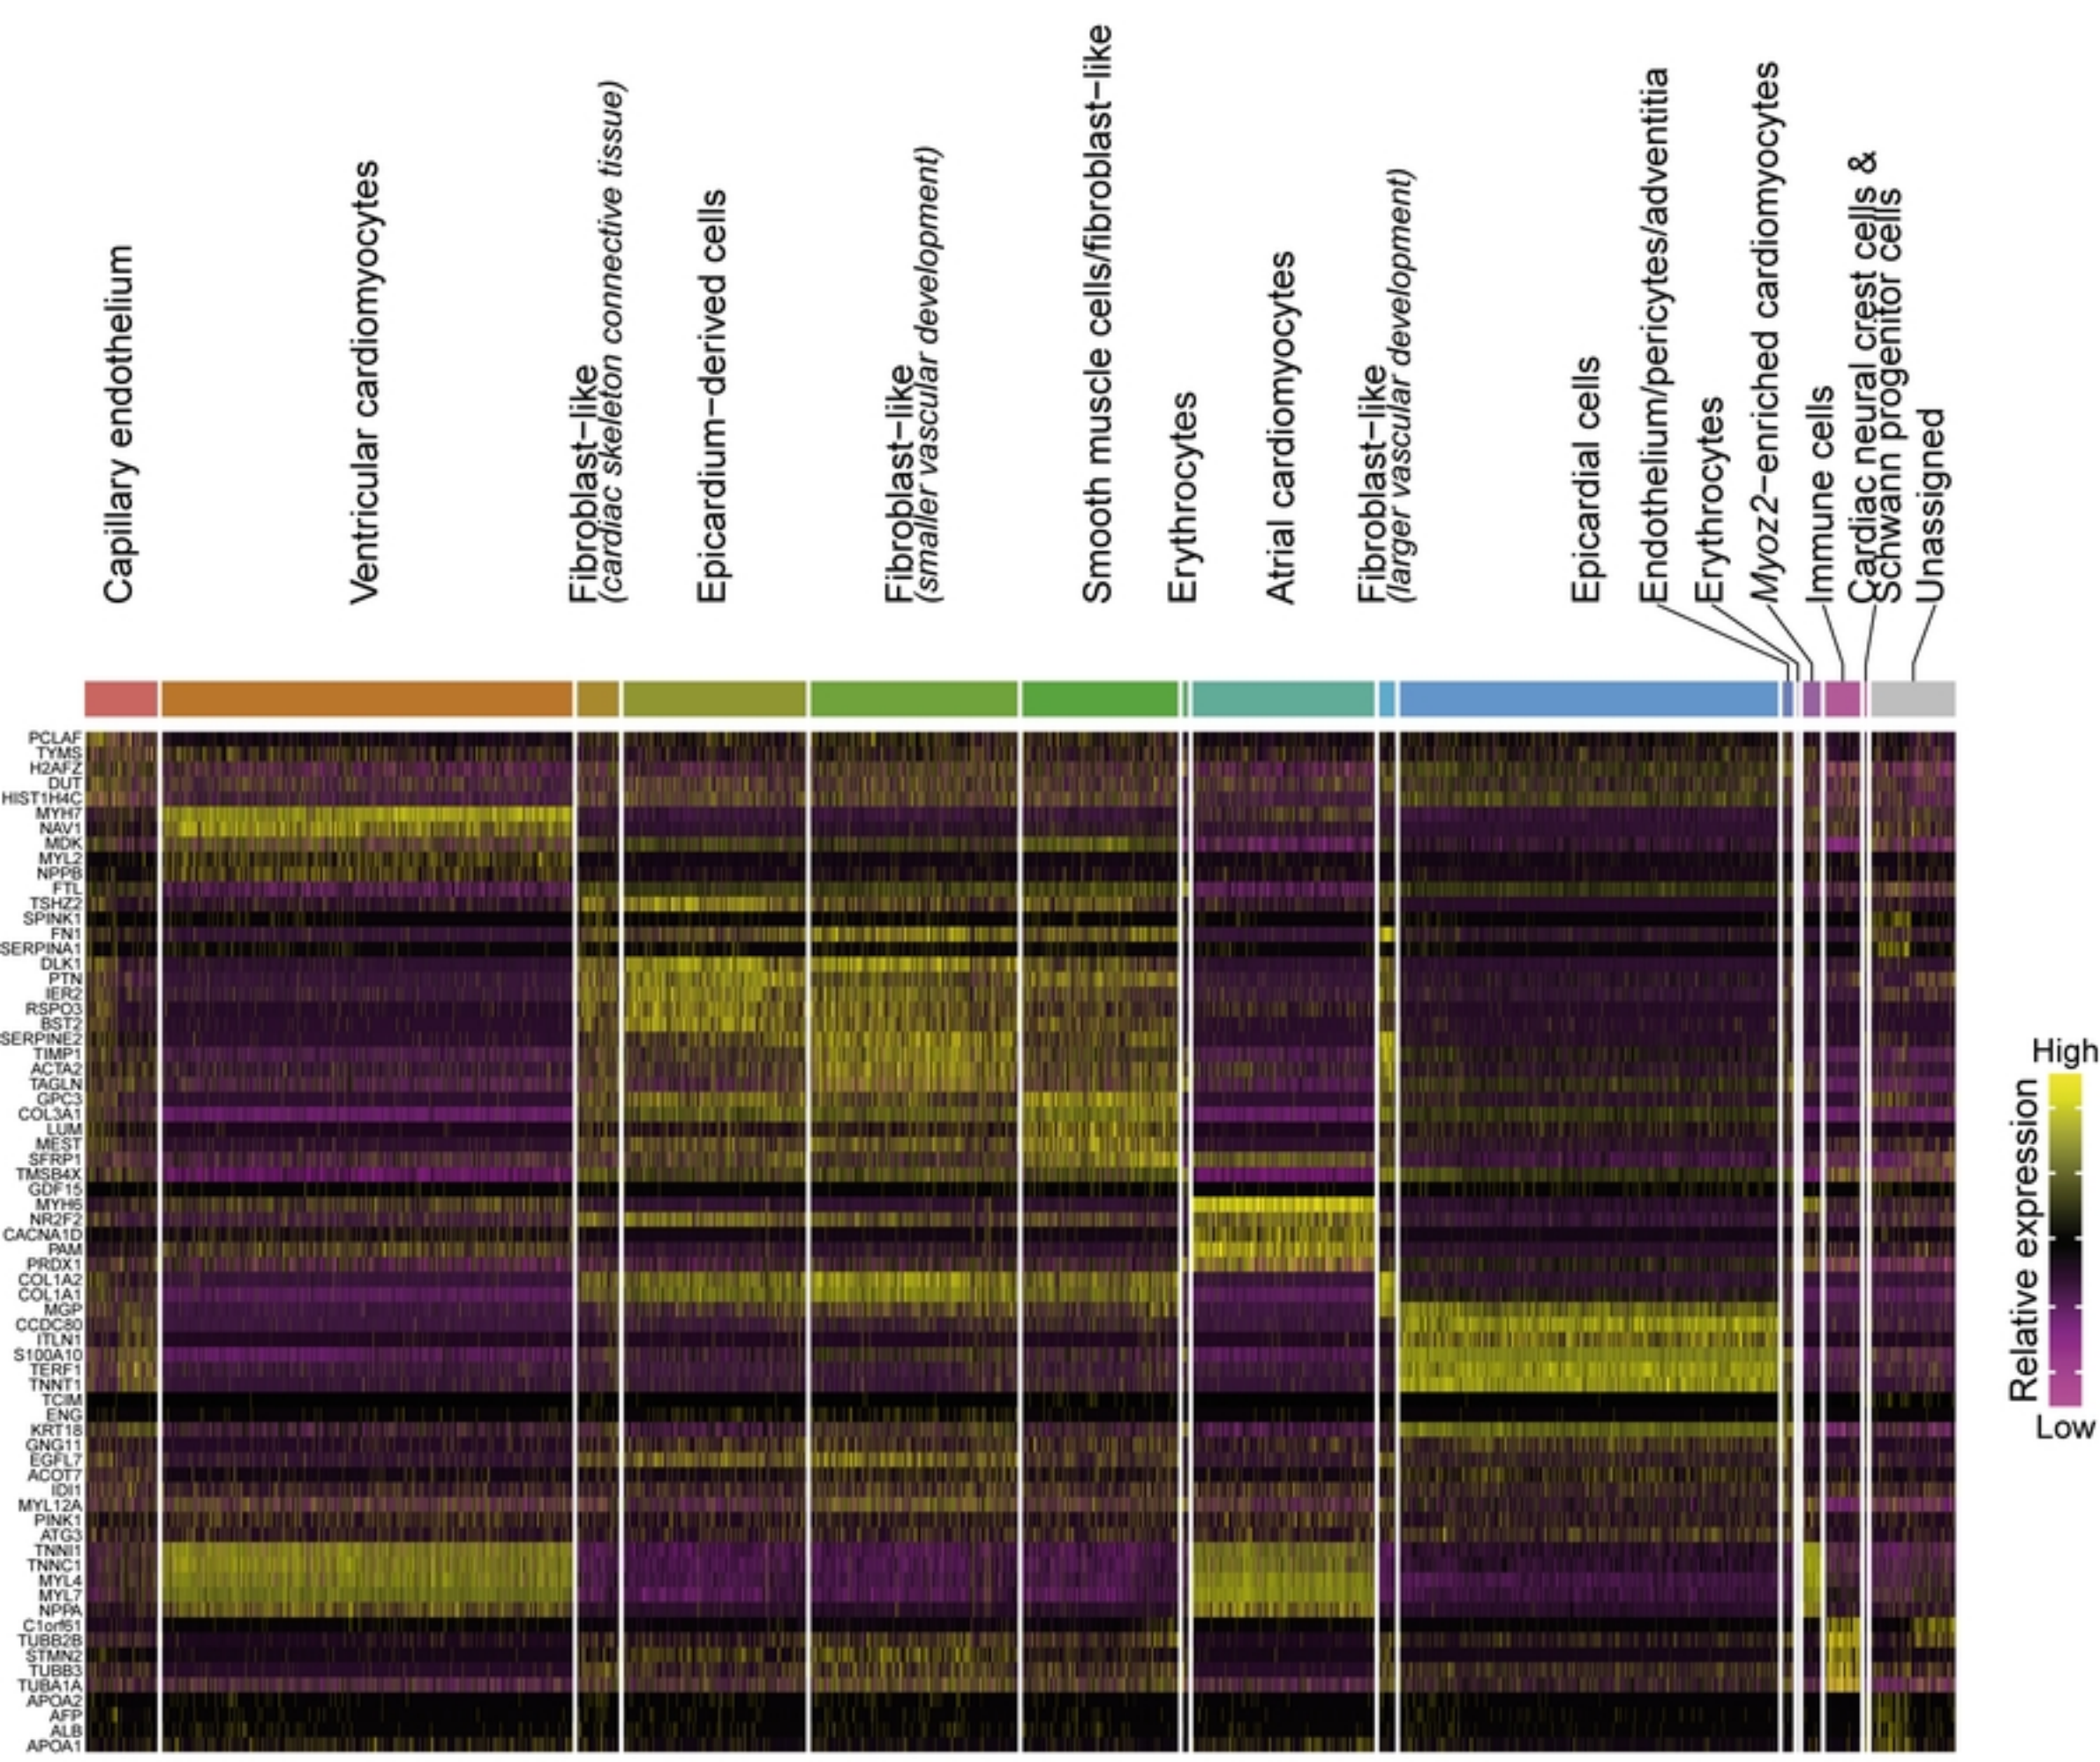

S1 Fig

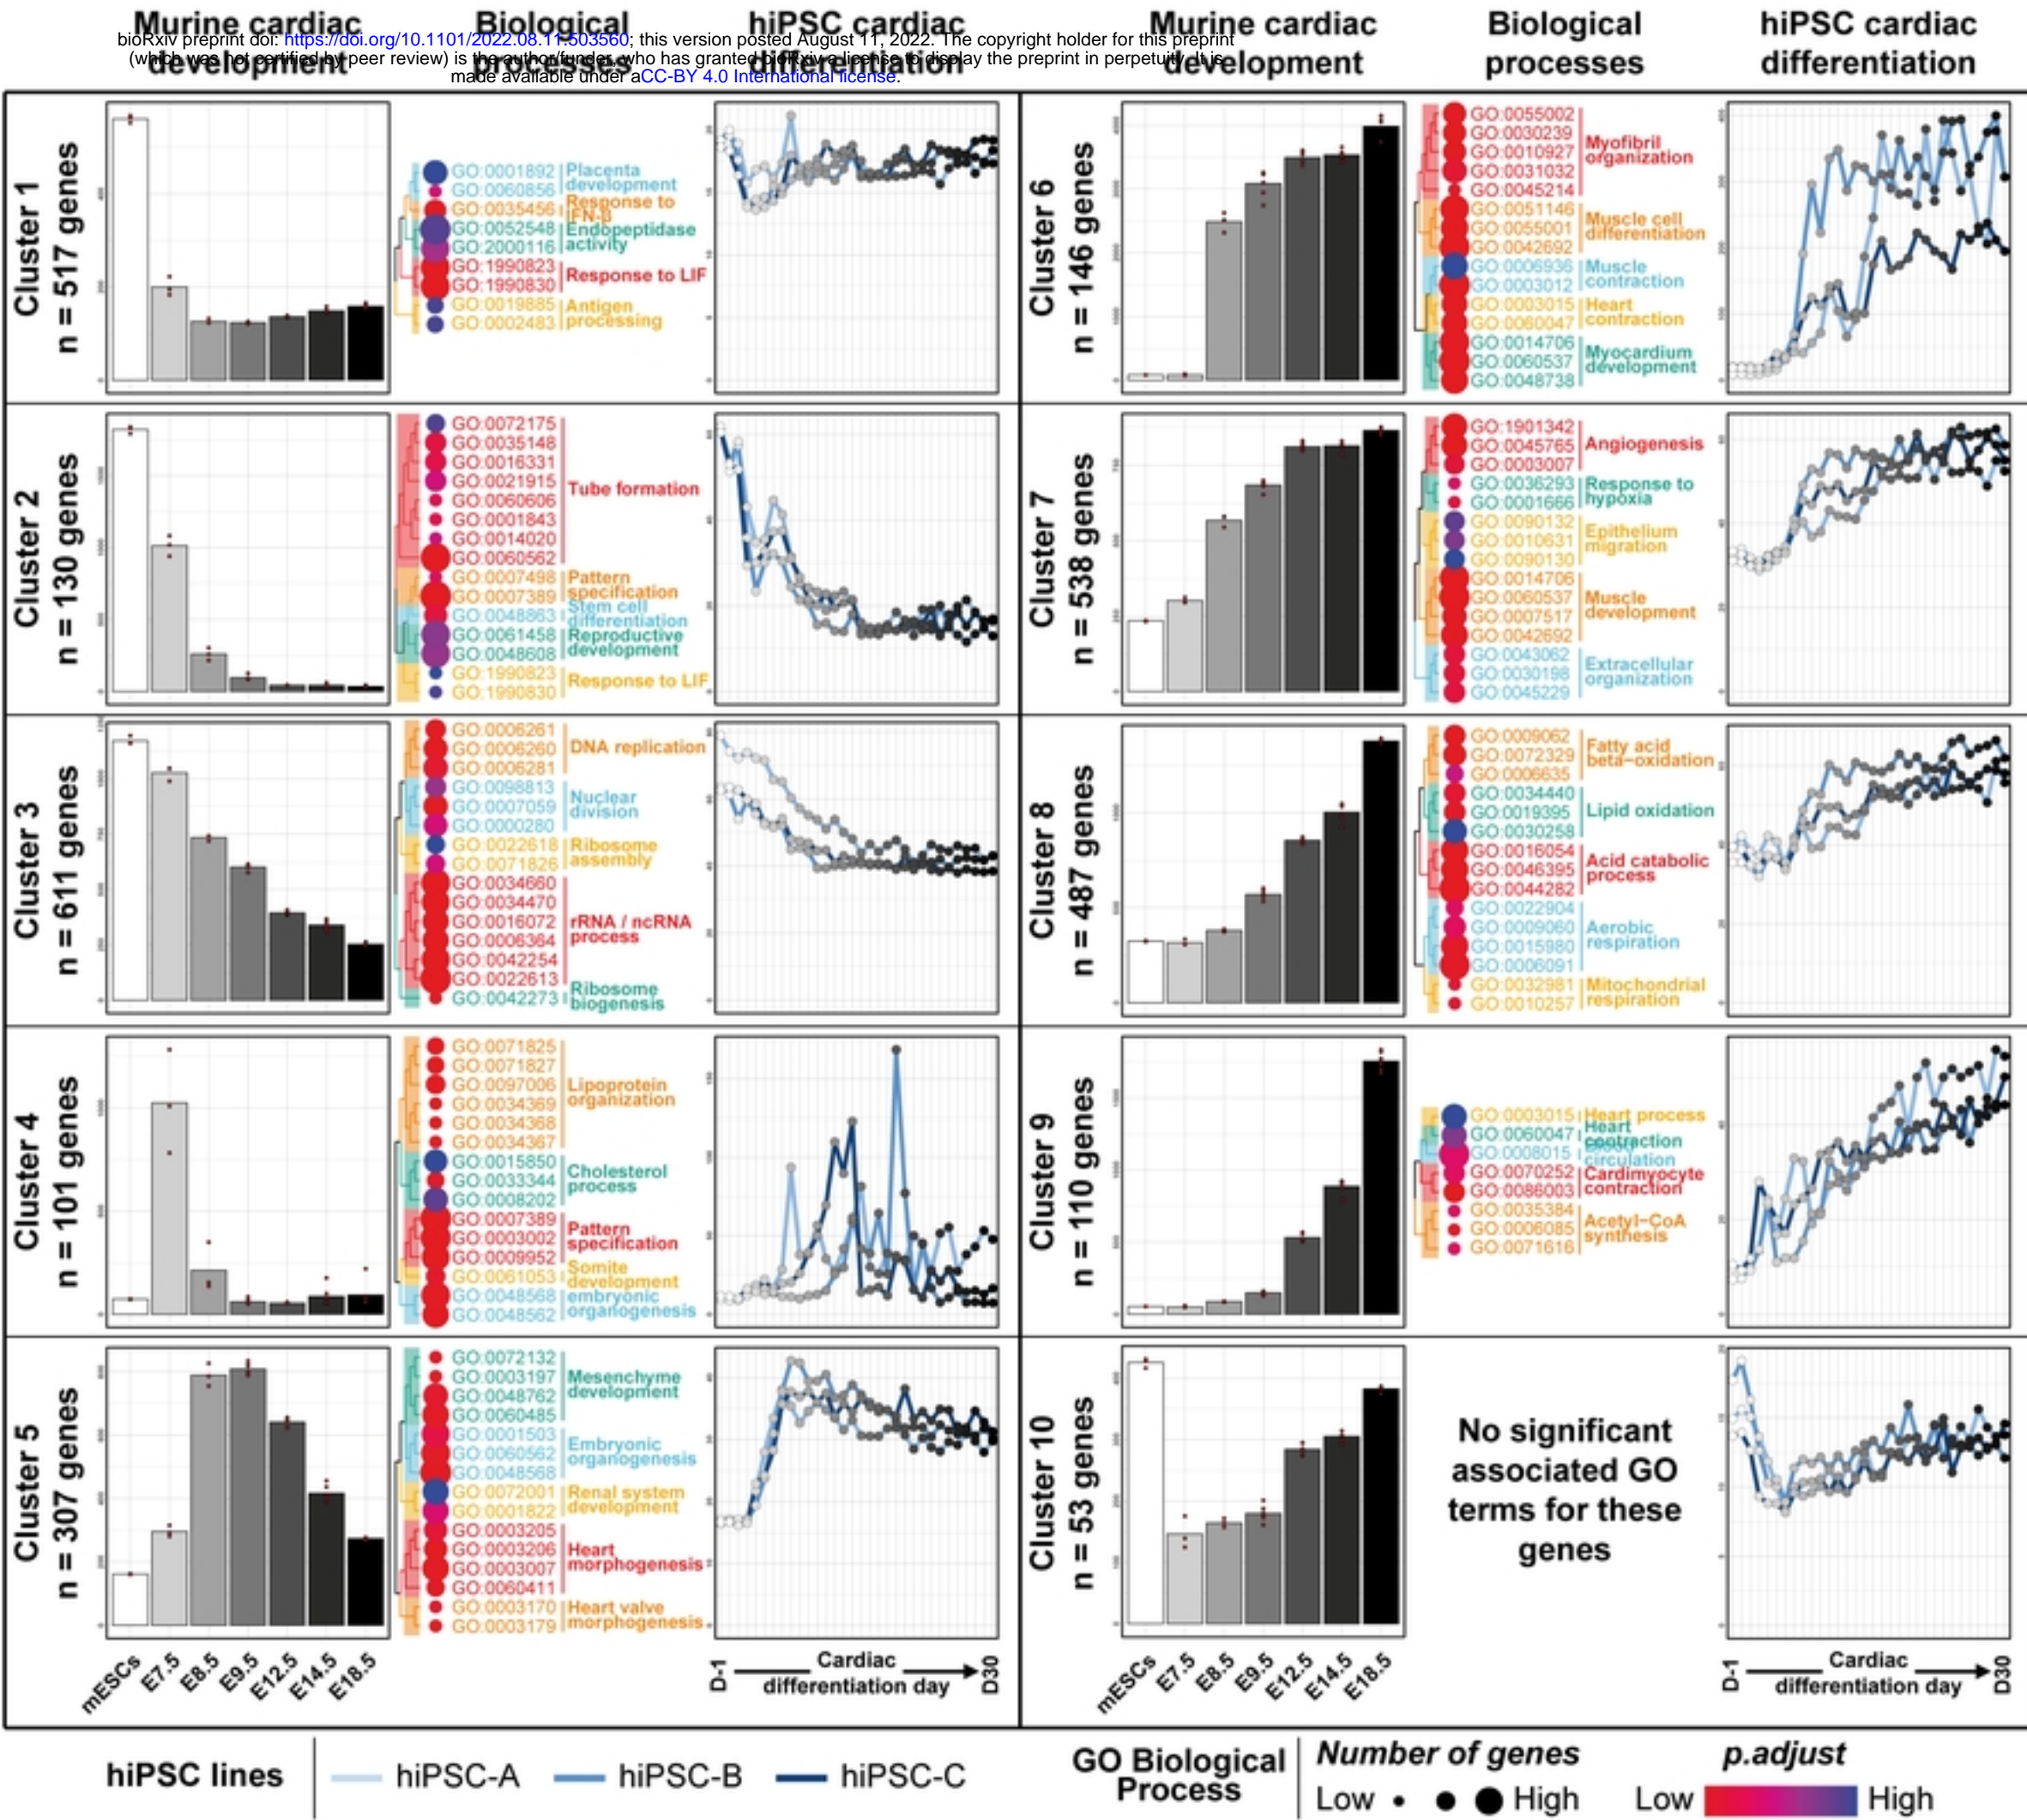



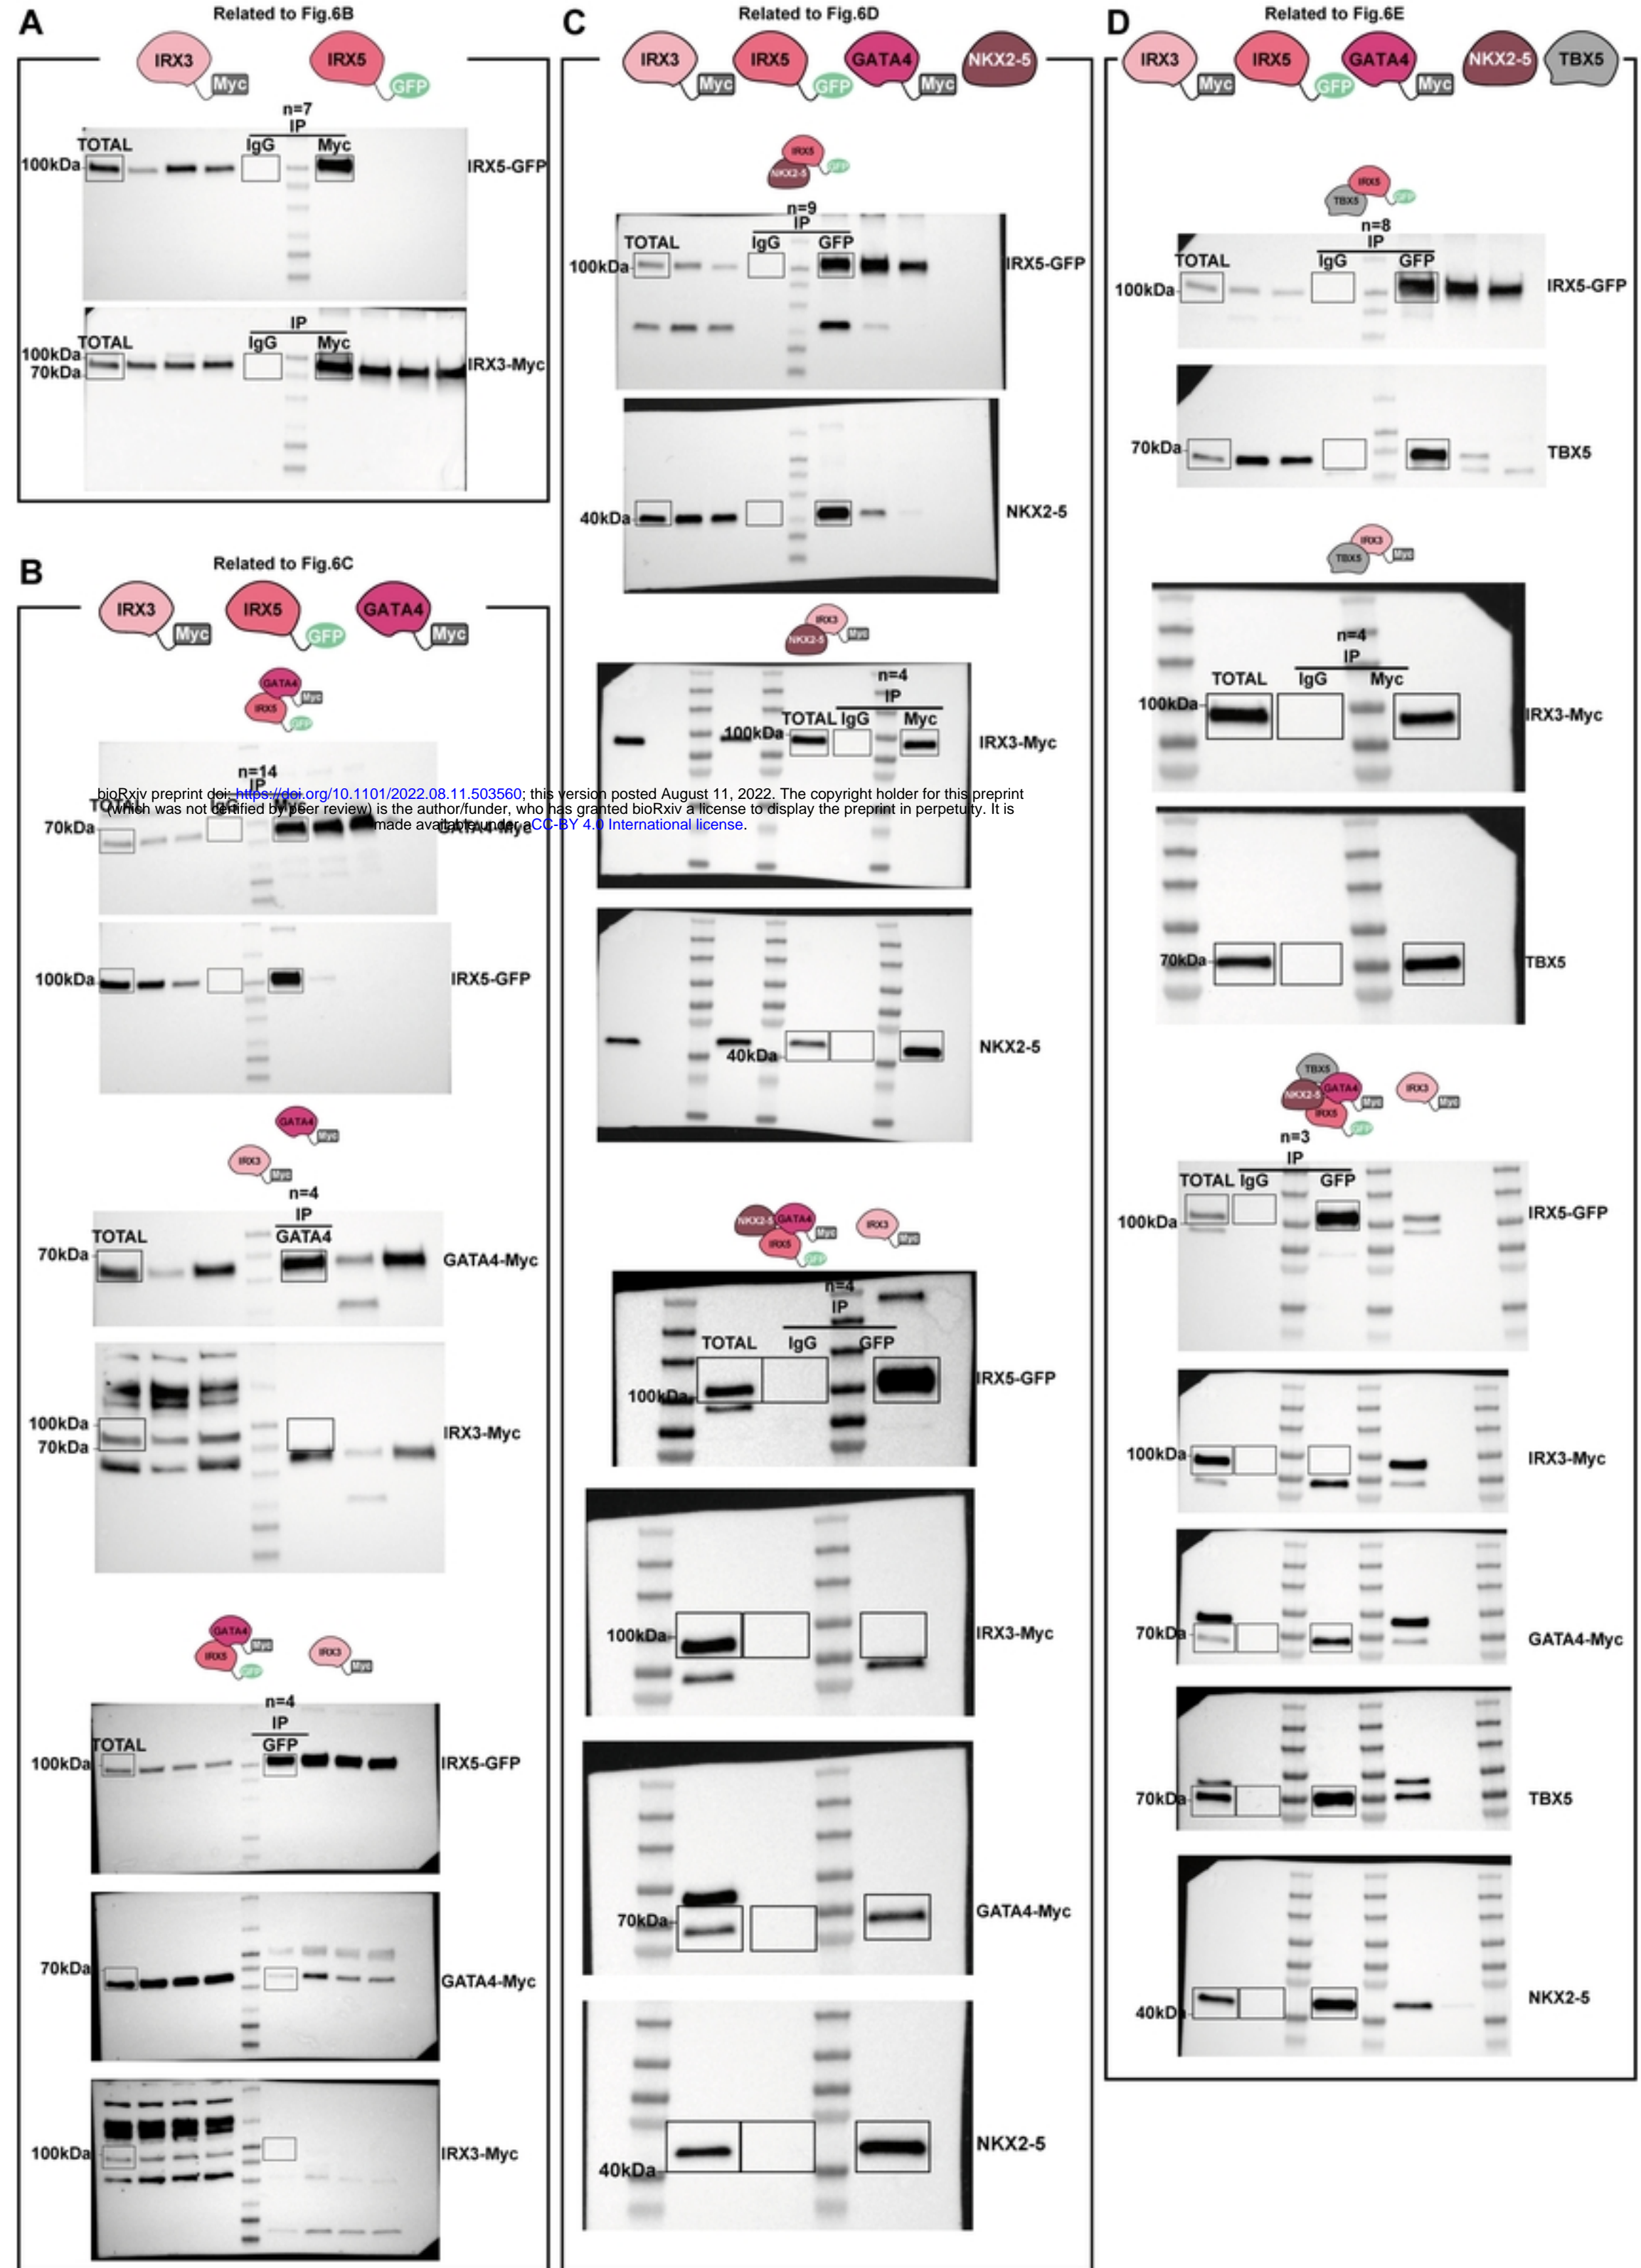

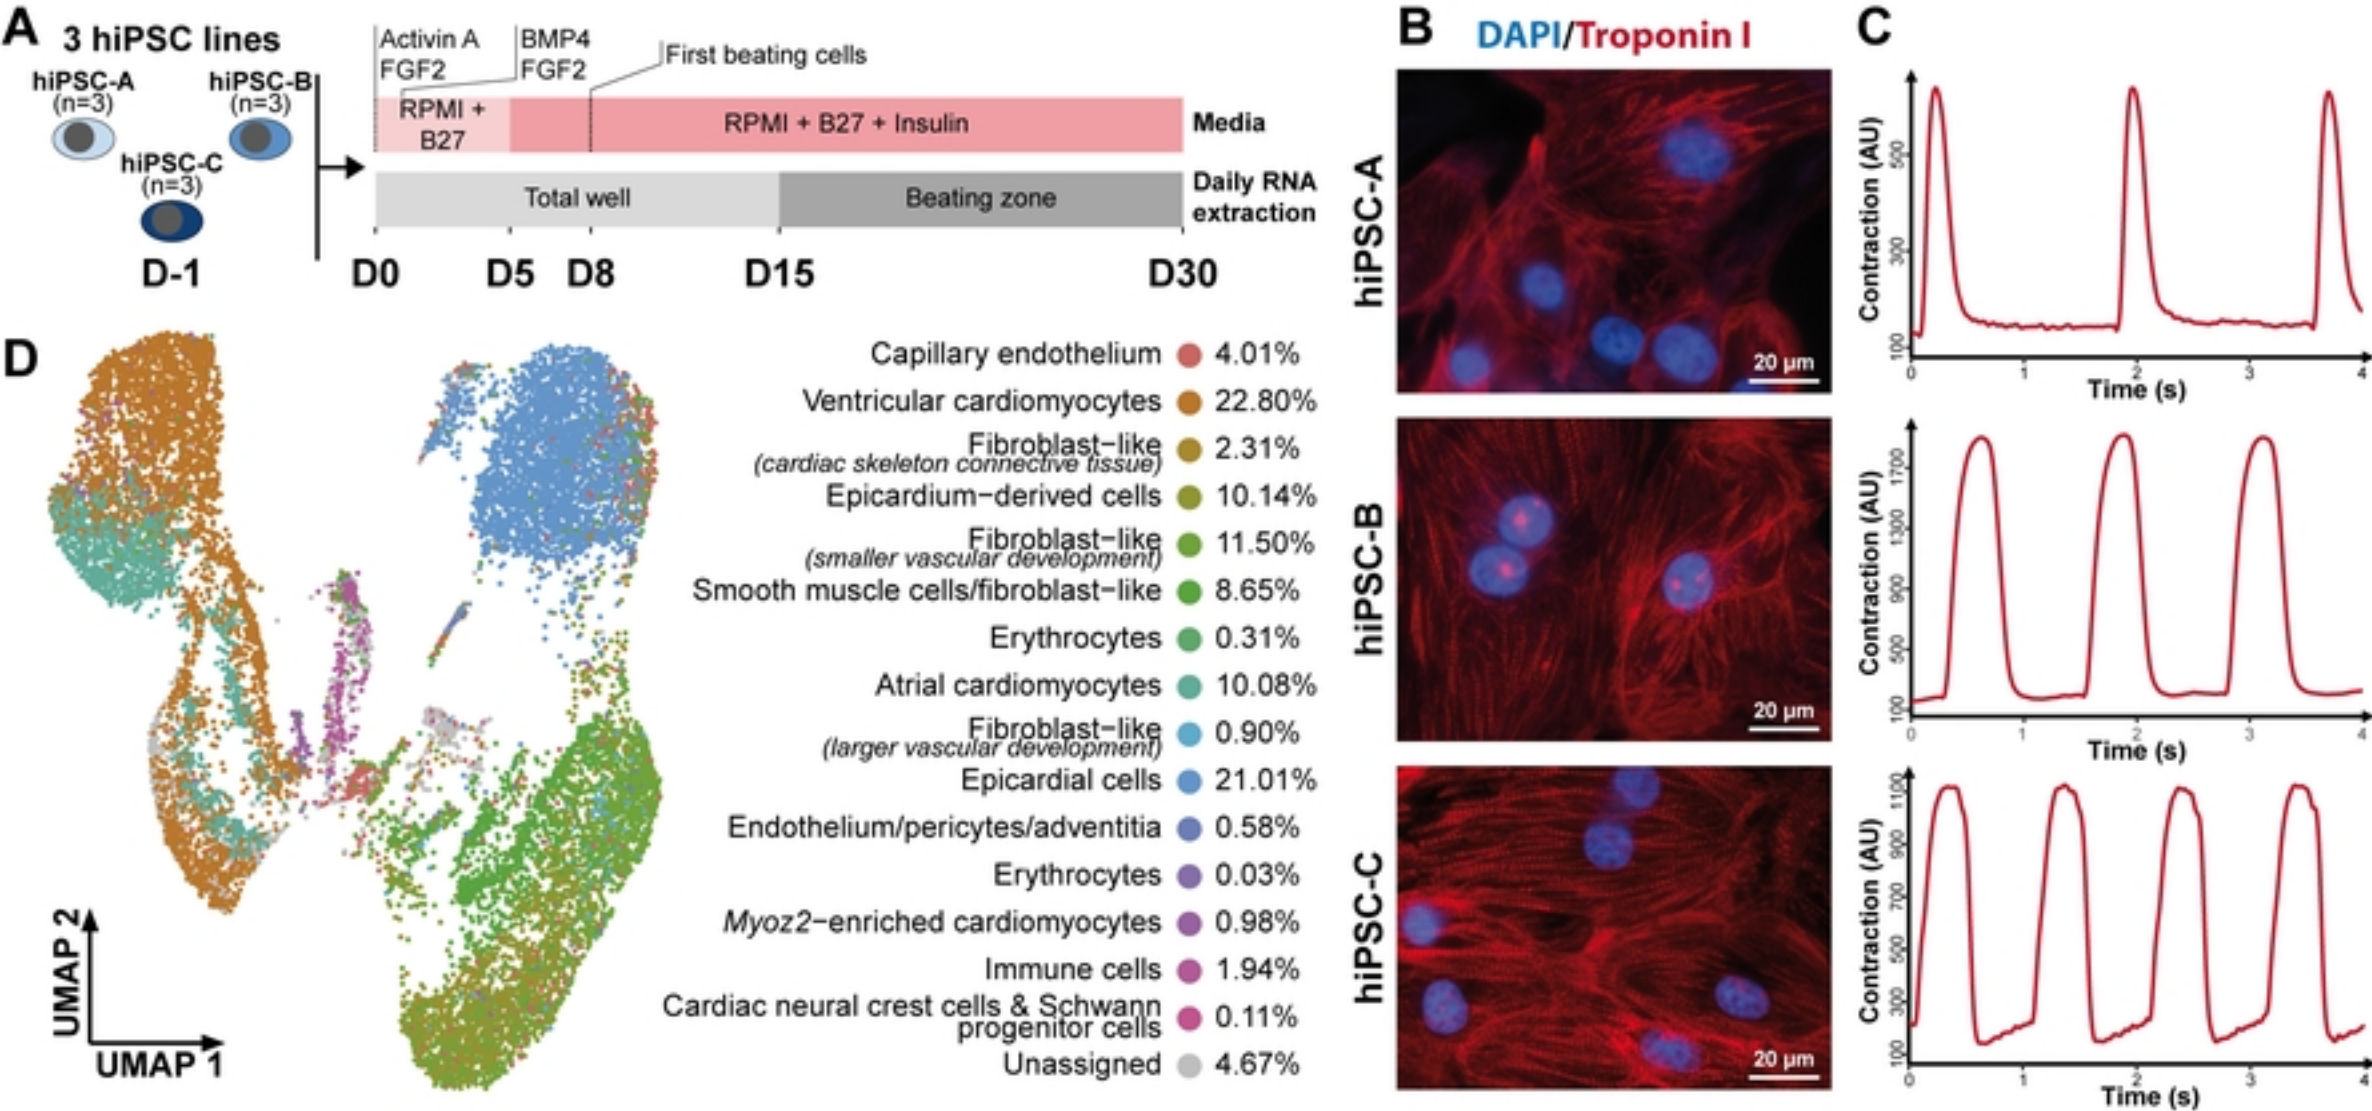

Fig 1

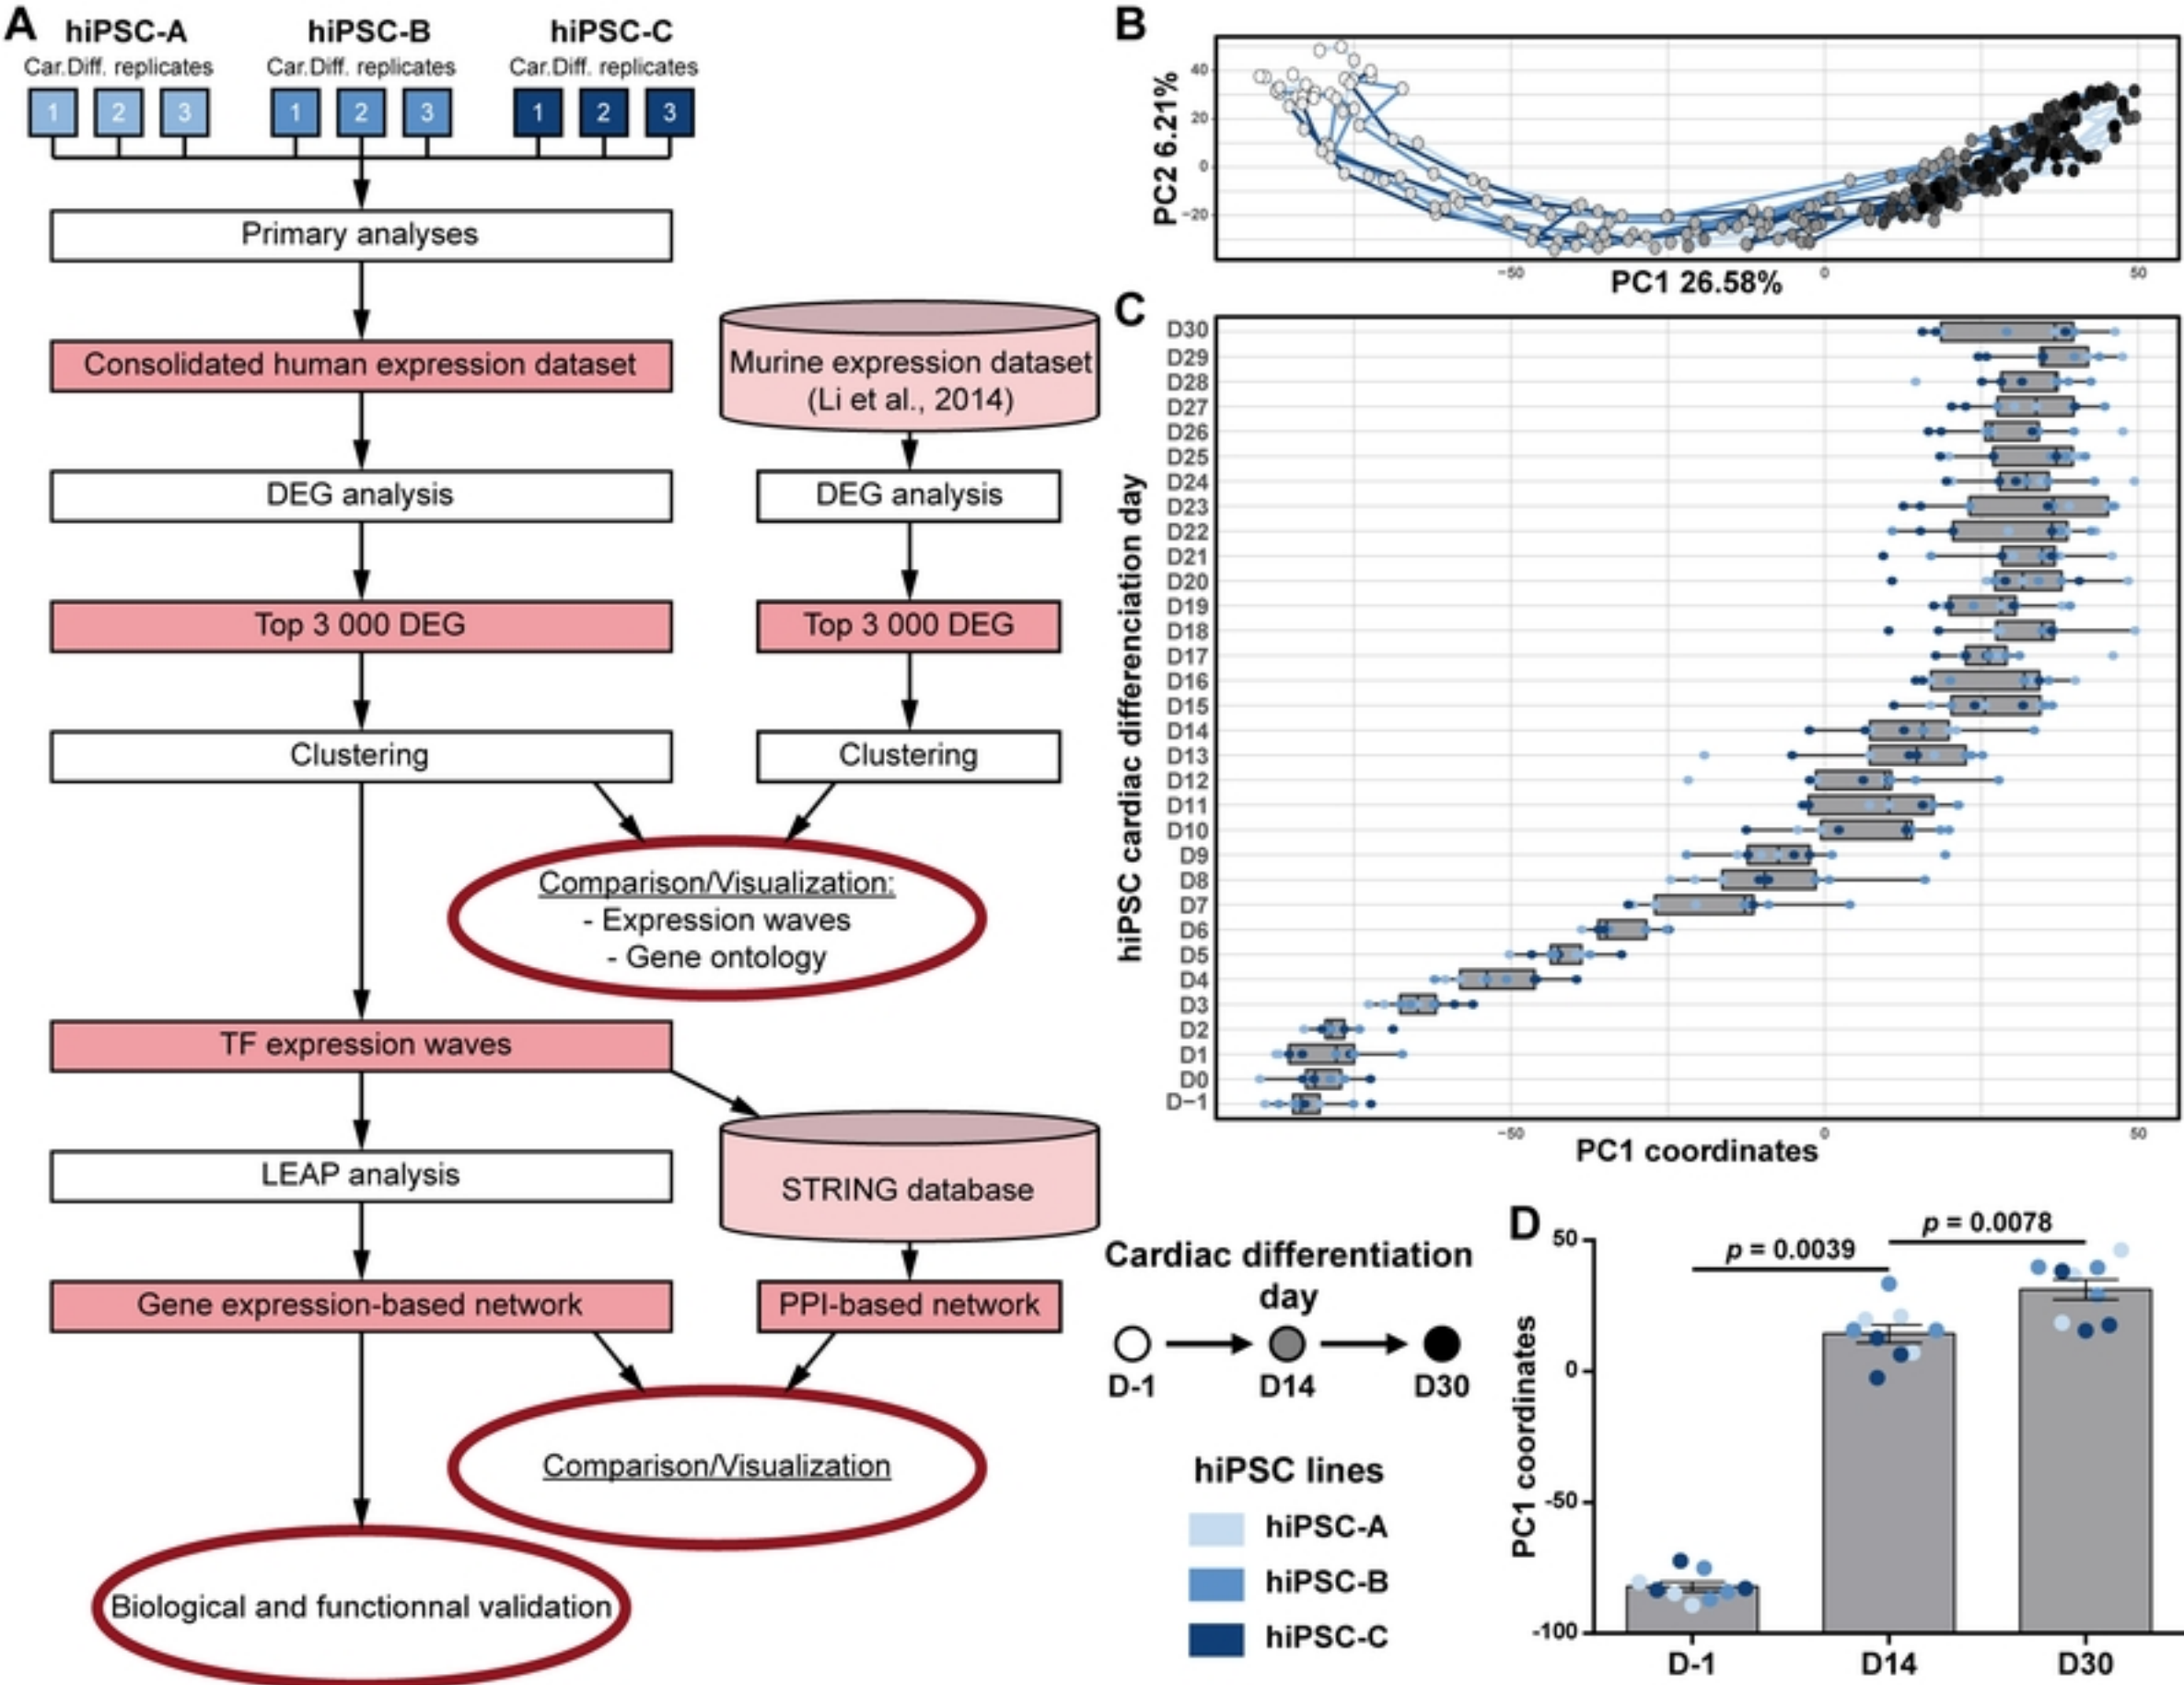

Fig 2

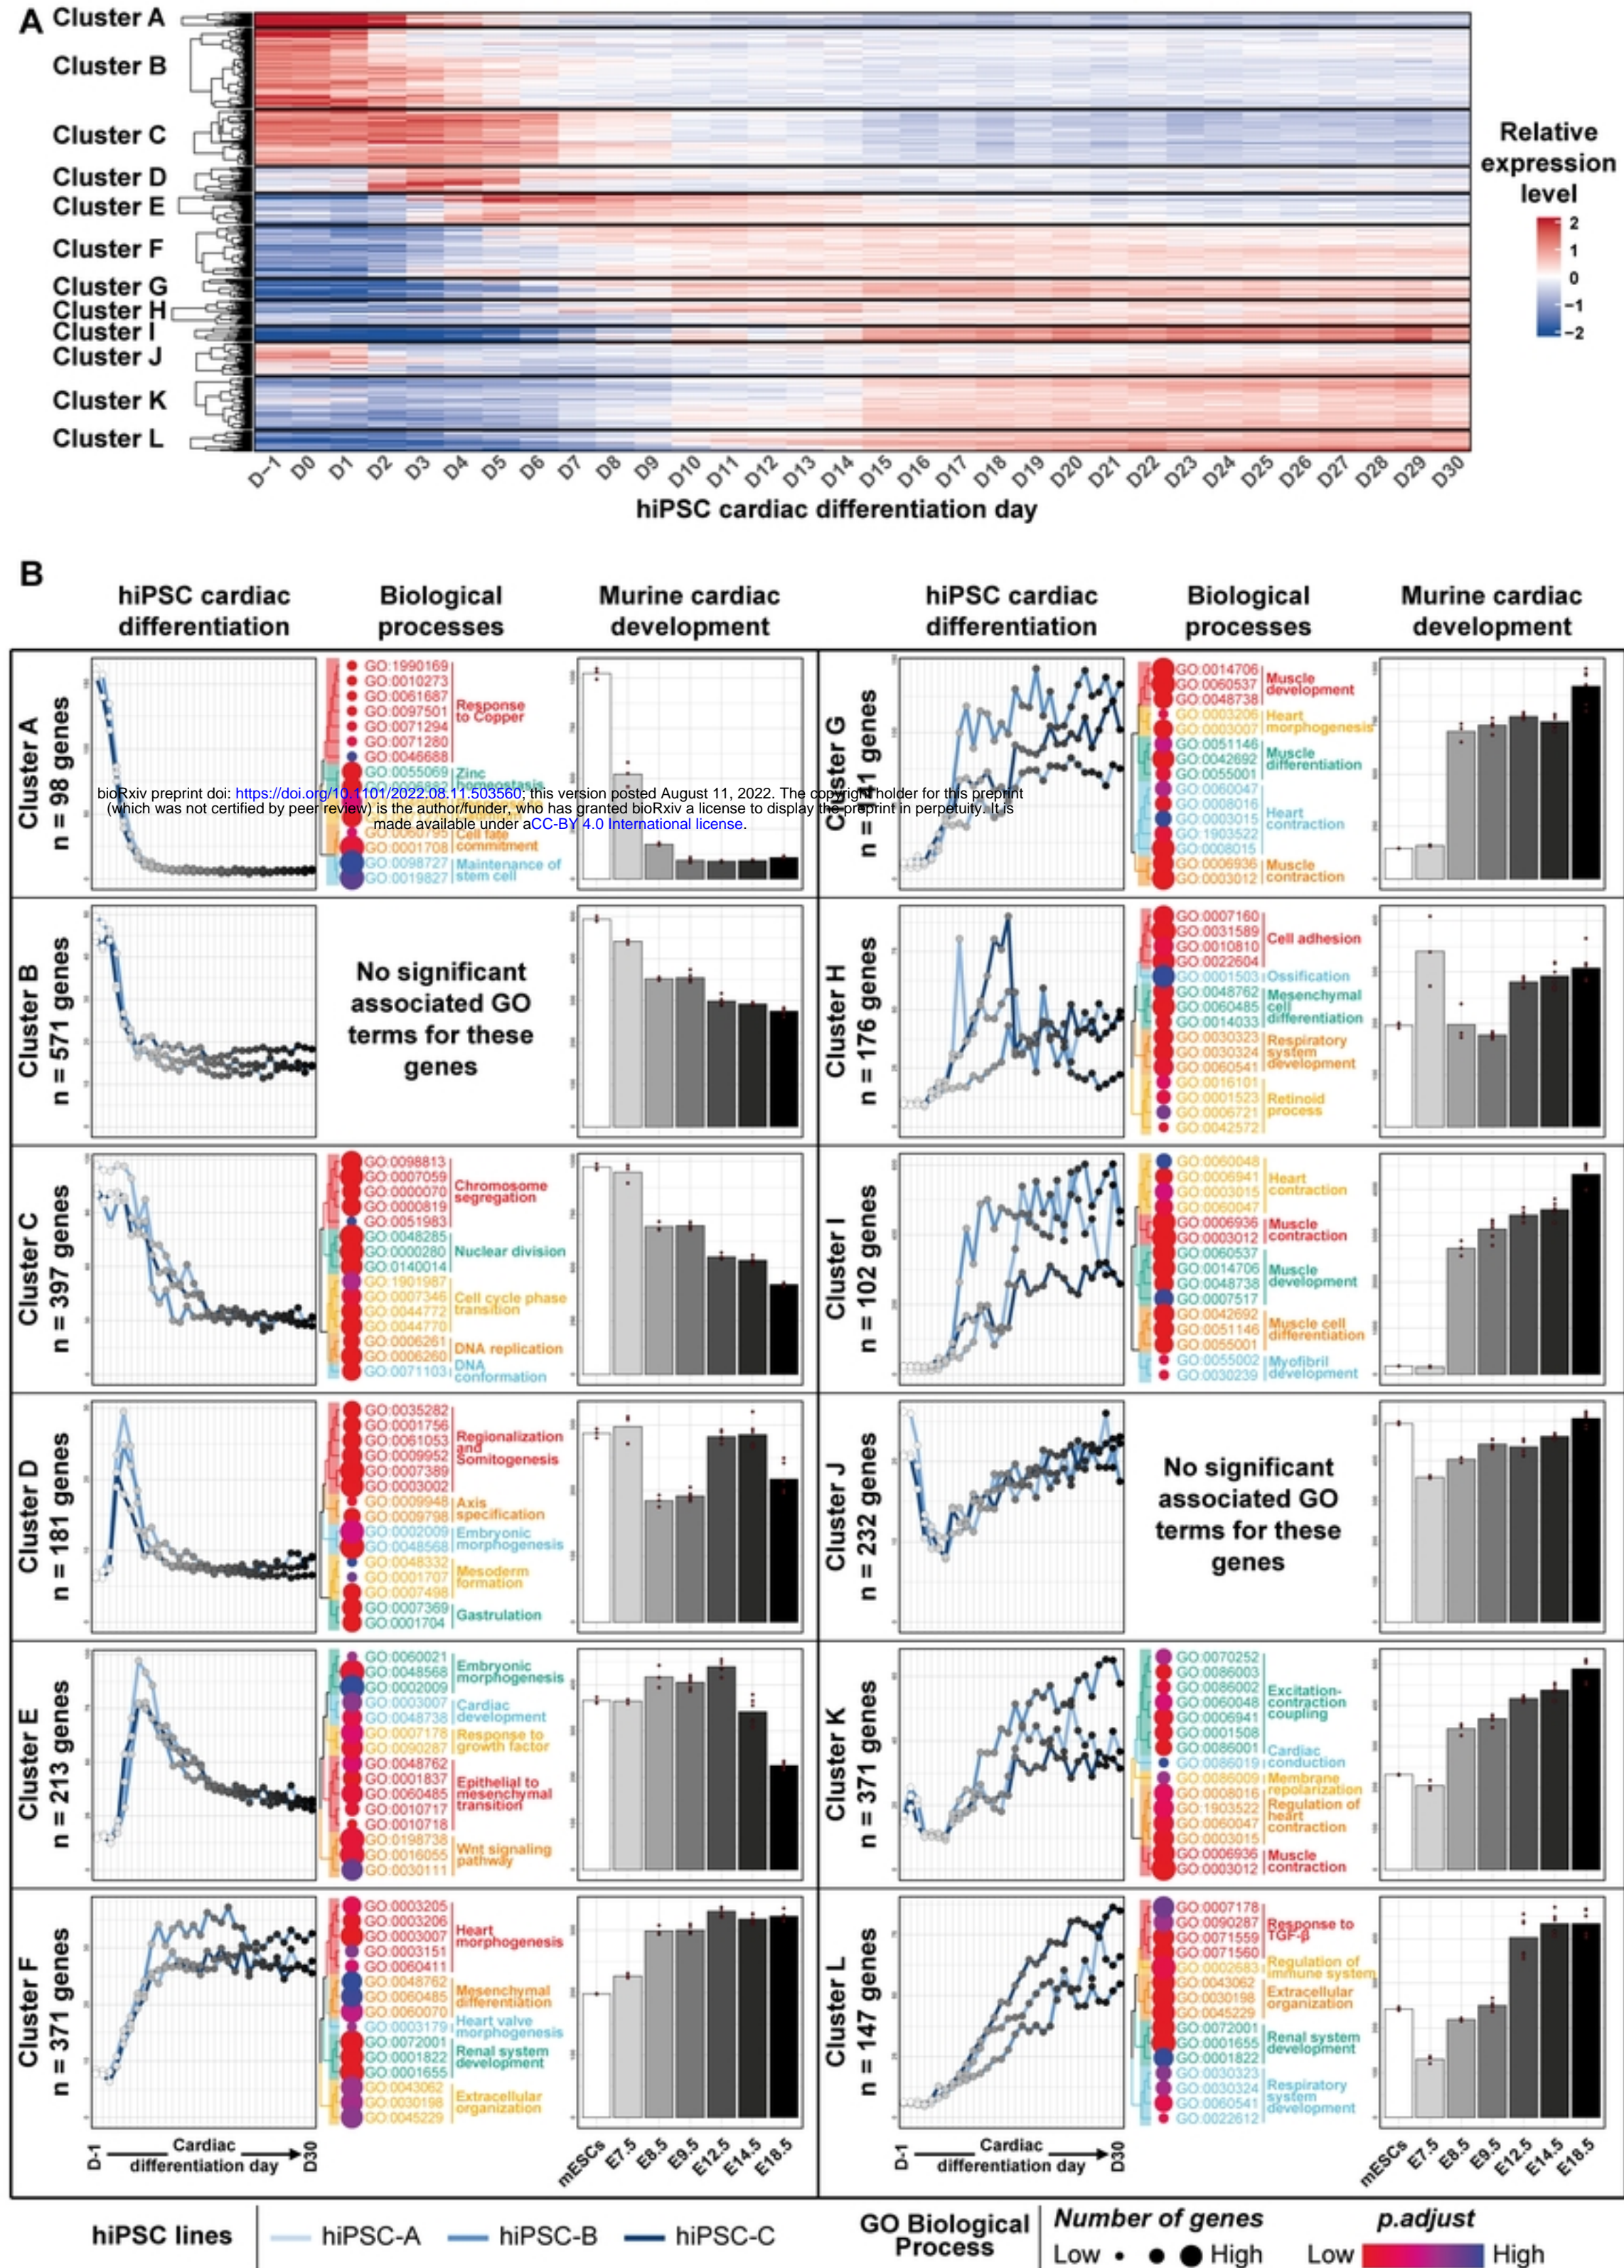

Fig 3

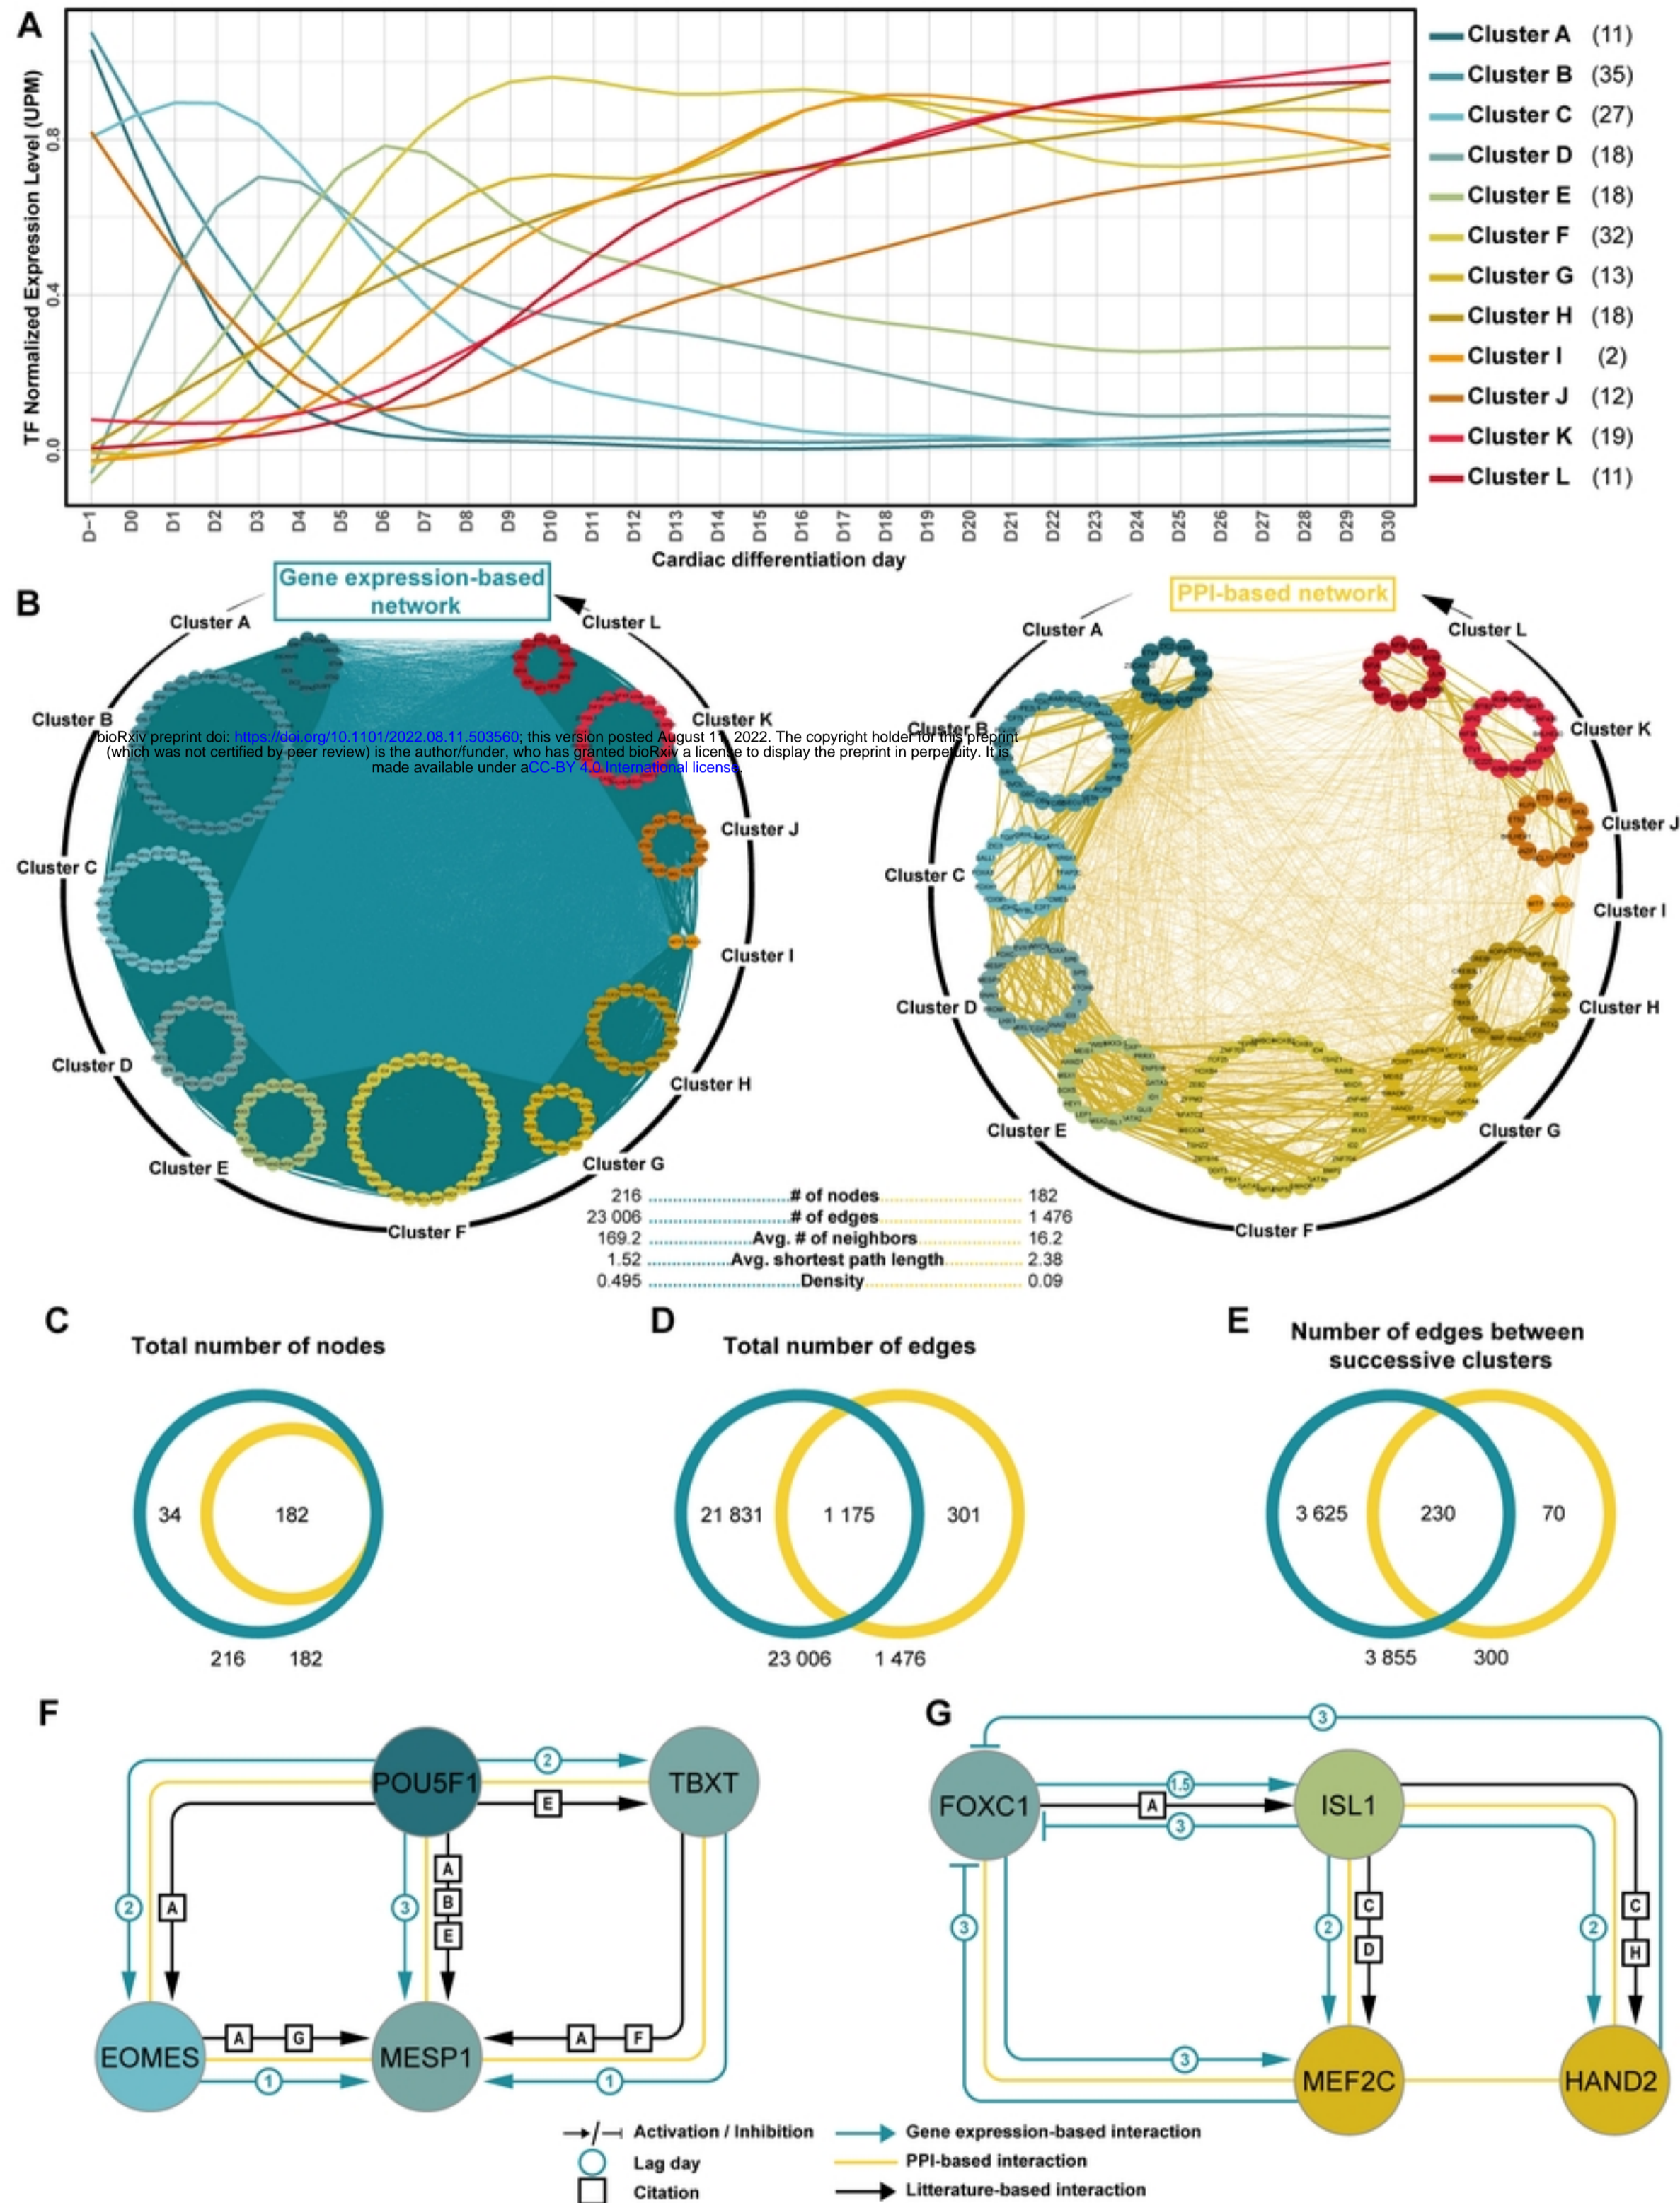

Fig 4

**A**

|      | Detected expression | Timecourse expression rank | Expression cluster |
|------|---------------------|----------------------------|--------------------|
| IRX1 | ✓                   | 20 177                     |                    |
| IRX2 | ✓                   | 20 165                     |                    |
| IRX3 | ✓                   | 187                        | F                  |
| IRX4 | ✓                   | 1 592                      | K                  |
| IRX5 | ✓                   | 831                        | F                  |
| IRX6 | ✗                   | 19 604                     |                    |

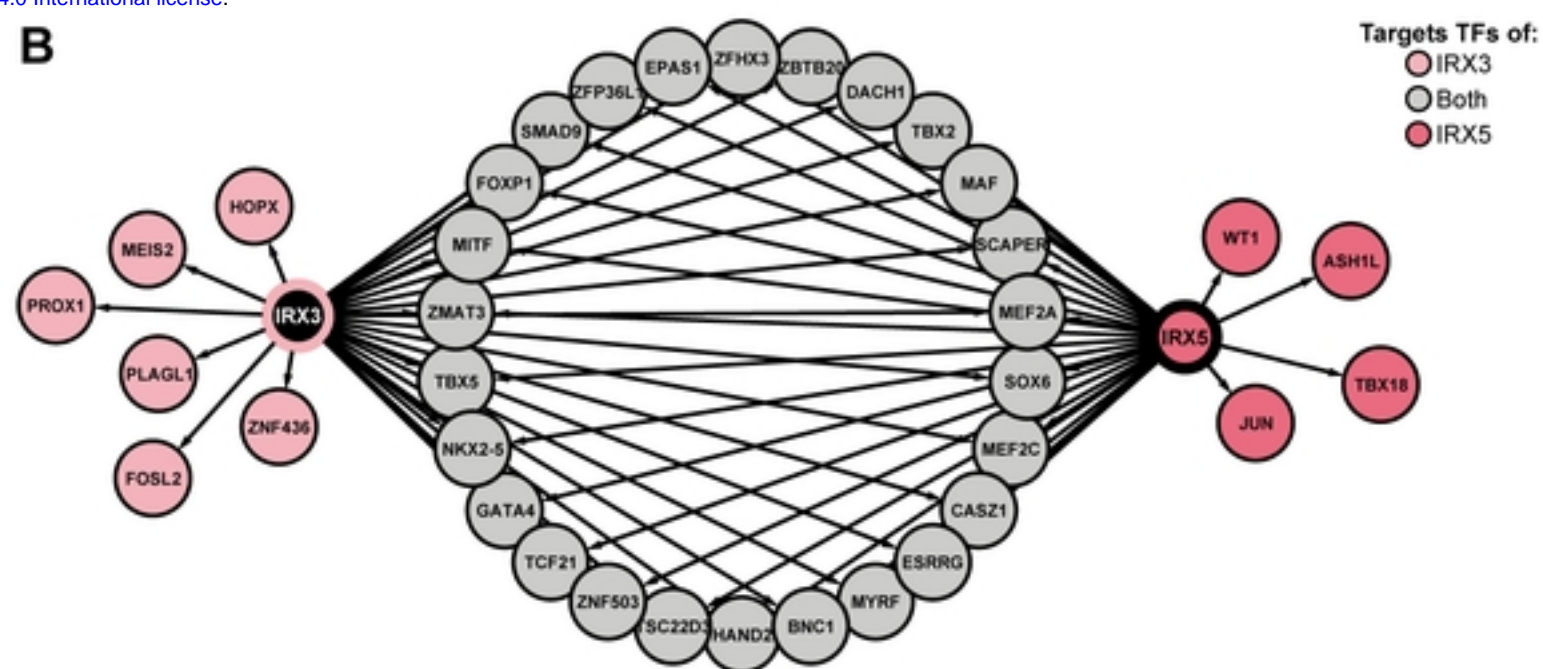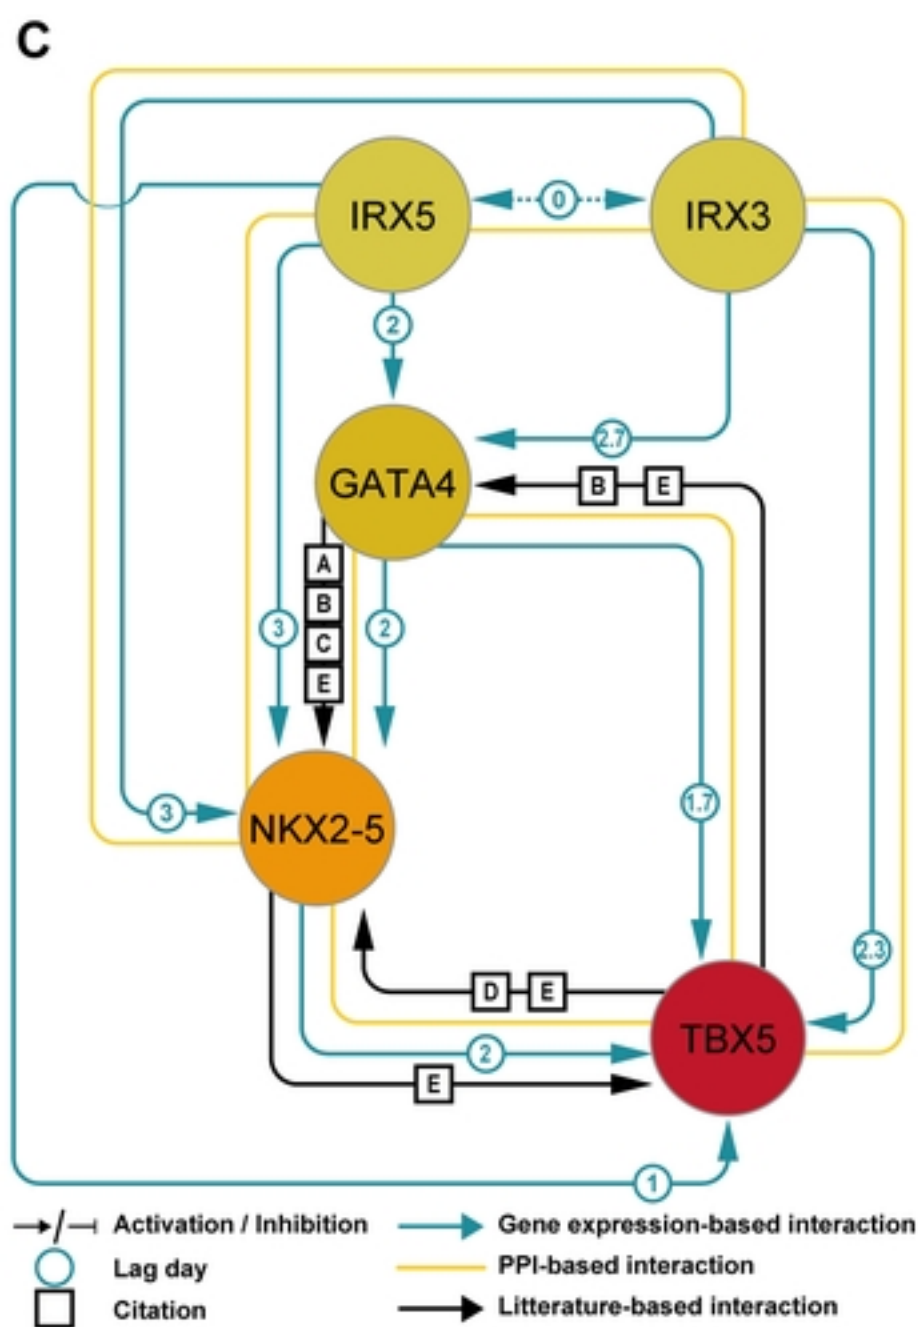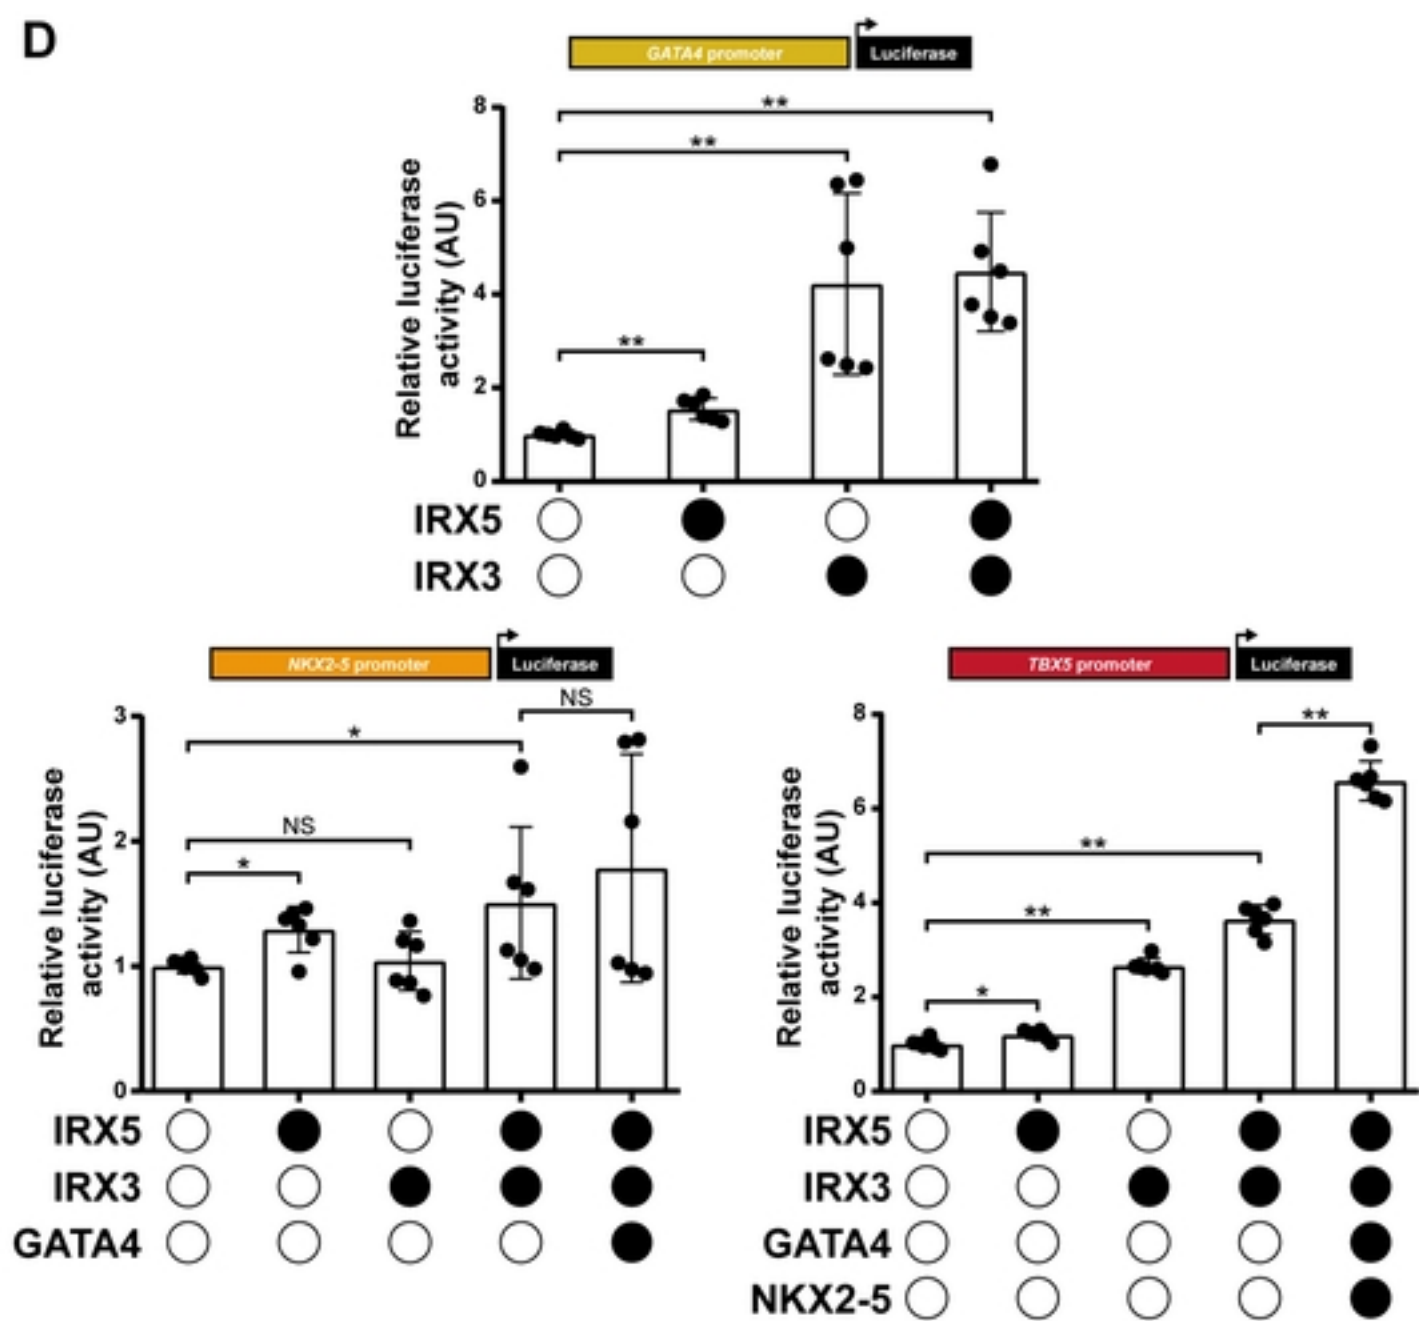

Fig 5

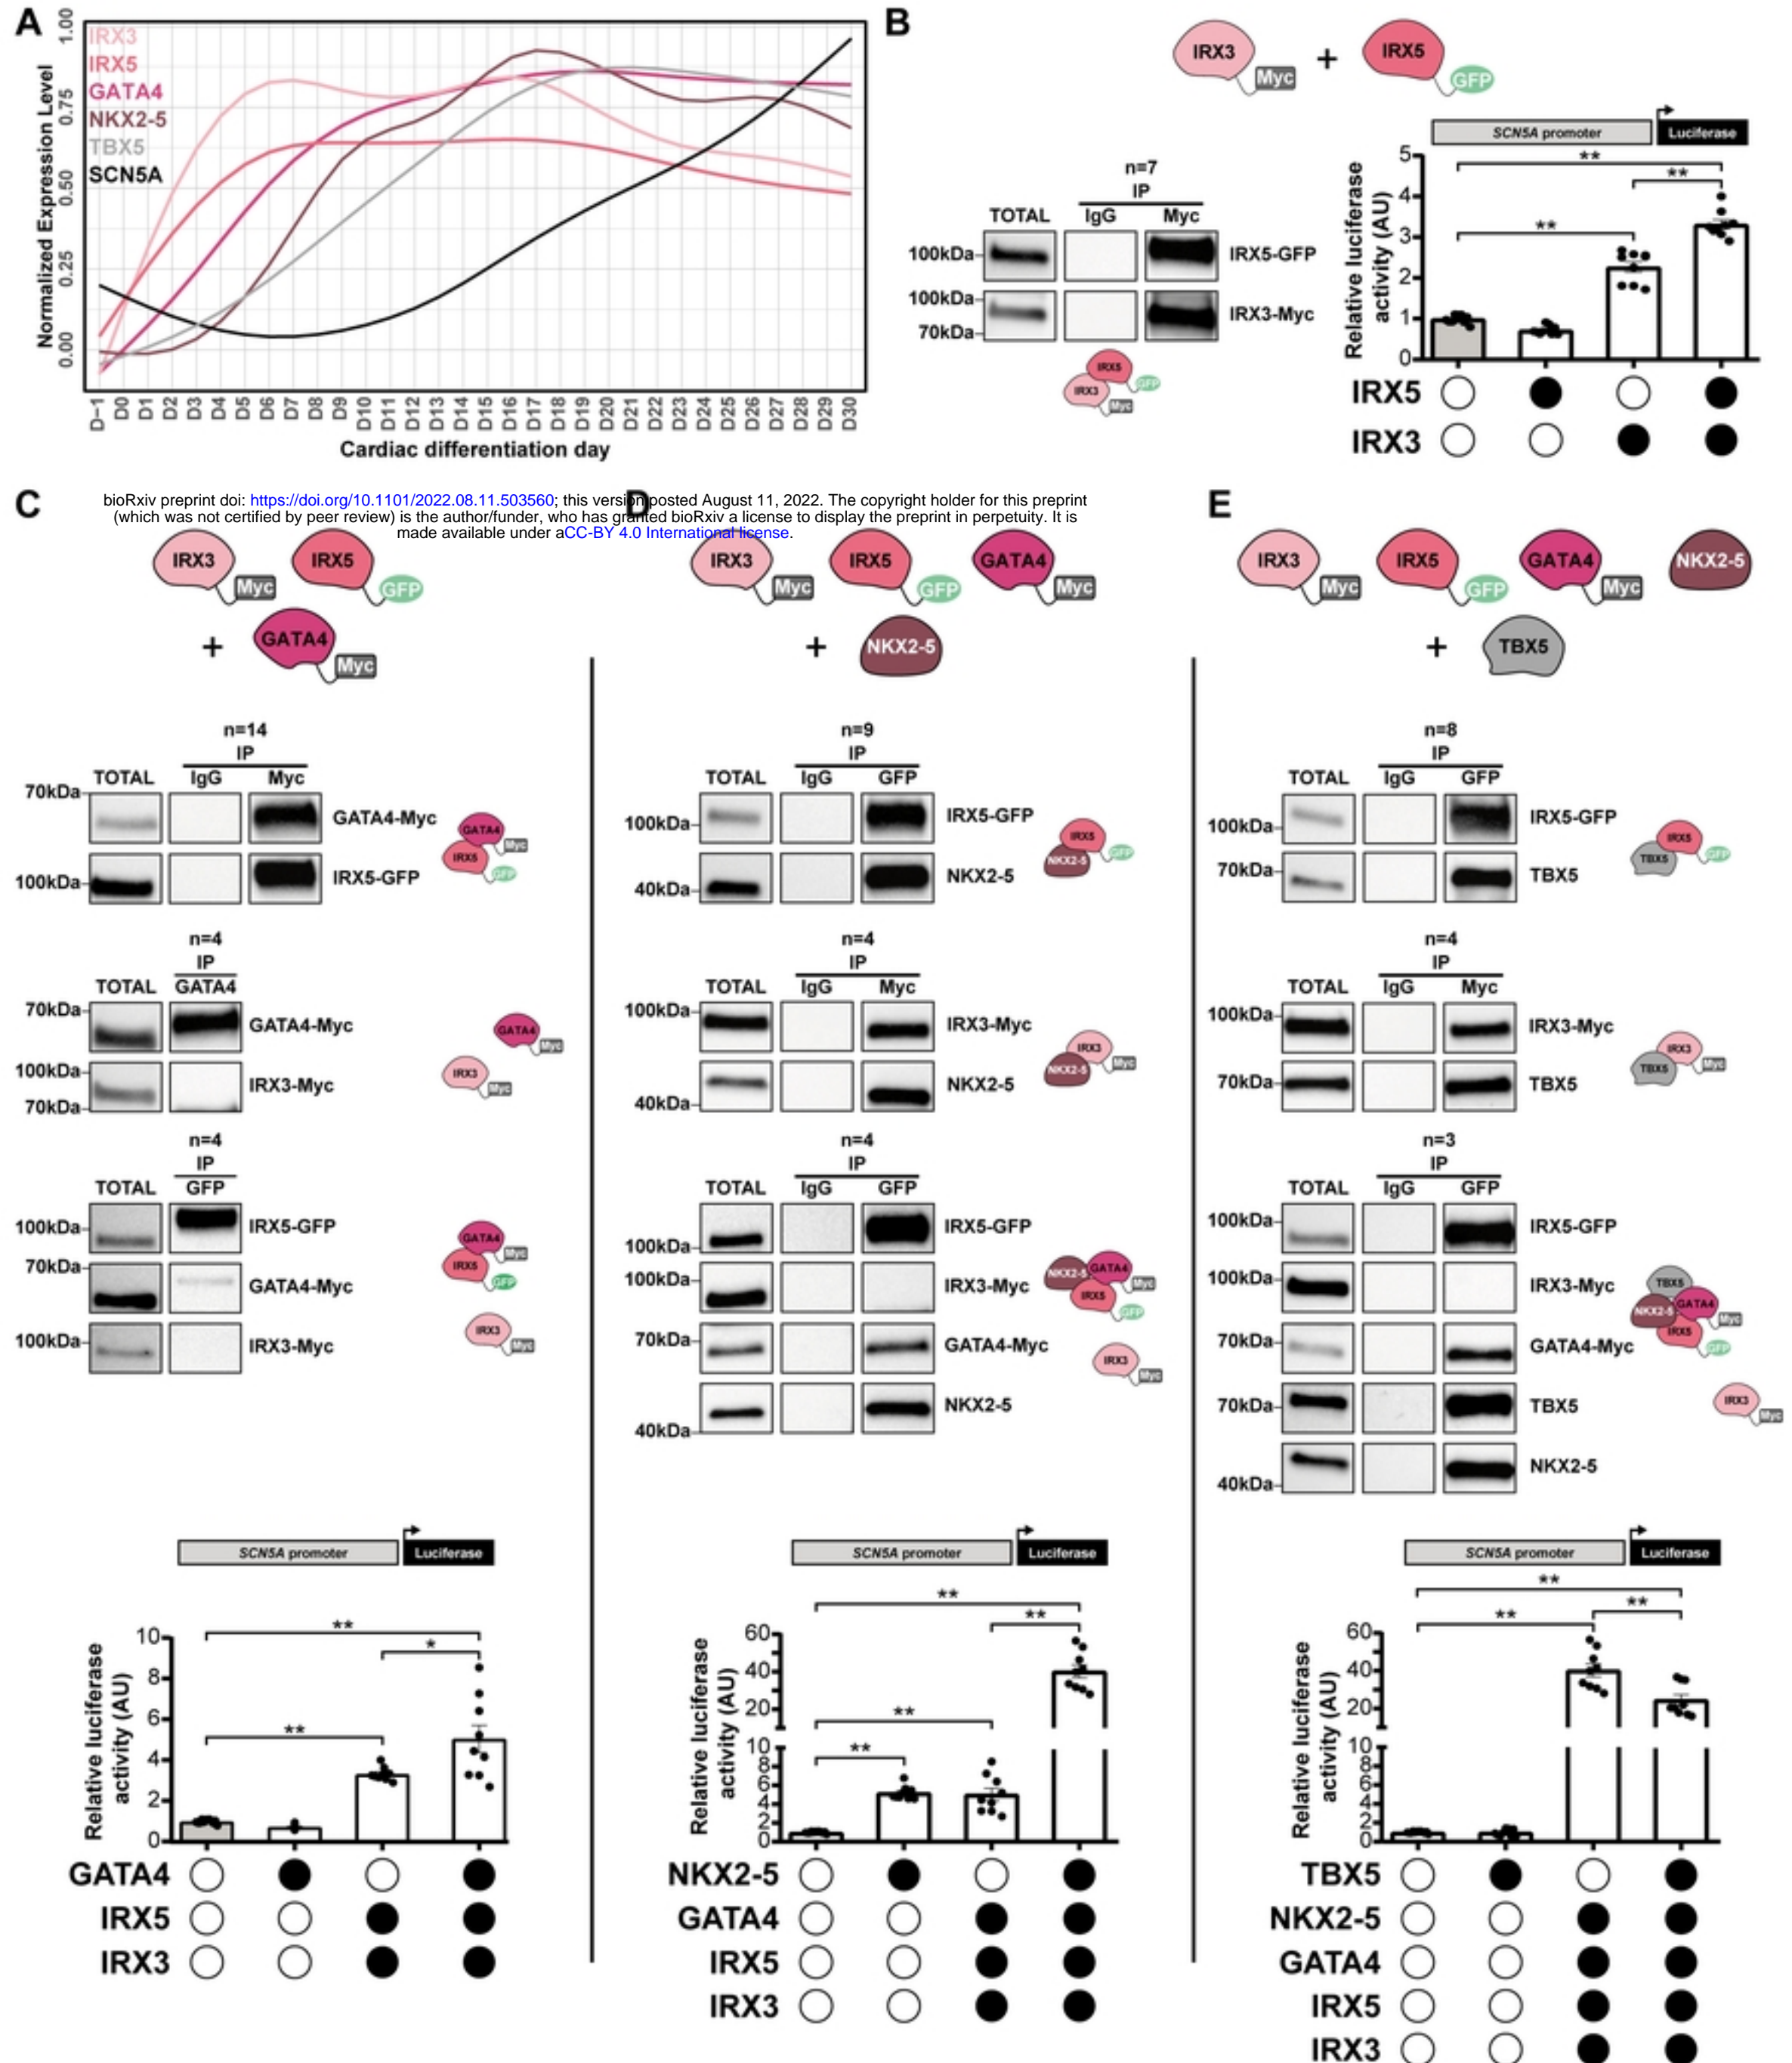

Fig 6
